# 1 Interferon-gamma and TNF-alpha synergistically enhance the 2 immunomodulatory capacity of Endometrial-Derived 3 Mesenchymal Stromal Cell secretomes by differential 4 microRNA and extracellular vesicle release

5 María de los Ángeles de Pedro<sup>1†</sup>, Federica Marinaro<sup>1</sup>, Esther López<sup>1\*</sup>, María Pulido<sup>1</sup>, Francisco  
6 Miguel Sánchez-Margallo<sup>2,3\*</sup>, Verónica Álvarez<sup>1</sup>, Javier G Casado<sup>1,2</sup>

7 <sup>1</sup>Stem Cell Therapy Unit, Jesús Usón Minimally Invasive Surgery Centre, Cáceres, Spain

8 <sup>2</sup>CIBER de Enfermedades Cardiovasculares (CIBERCV), Madrid, Spain

9 <sup>3</sup>Scientific Direction, Jesús Usón Minimally Invasive Surgery Centre, Cáceres, Spain

10 Corresponding author: Esther López (elopez@ccmijesususon.com)

## 11 Abstract

12 Endometrial Mesenchymal Stromal Cells (endMSCs) can be easily isolated from menstrual blood by  
13 plastic adherence. These cells have a potent pro-angiogenic and immunomodulatory capacity, and  
14 their therapeutic effect is mediated by paracrine mechanisms where secretome have a key role. In this  
15 paper, we aimed to evaluate different priming conditions in endMSCs using pro-inflammatory  
16 cytokines and Toll-Like Receptor ligands. Our *in vitro* results revealed a synergistic and additive  
17 effect of IFN $\gamma$  and TNF $\alpha$  on endMSCs. The combination of these pro-inflammatory cytokines  
18 significantly increased the release of Indoleamine 2,3-dioxygenase (IDO1) in endMSCs.  
19 Additionally, this study was focused on the phenotype of IFN $\gamma$ /TNF $\alpha$ -primed endMSCs  
20 (endMSCs\*). Here we found that immune system-related molecules such as CD49d, CD49e, CD54,  
21 CD56, CD58, CD63, CD126, CD152, or CD274 were significantly altered in endMSCs\* when  
22 compared to control cells. Afterward, our study was completed with the characterization of released  
23 miRNAs by Next Generation Sequencing (NGS). Briefly, our system biology approaches  
24 demonstrated that endMSCs\* showed an increased release of 25 miRNAs whose target genes were  
25 involved in immune response and inflammation. Finally, the cellular and molecular characterization  
26 was completed with *in vitro* functional assays.

27 In summary, the relevance of our results lies in the therapeutic potential of endMSCs\*. The  
28 differences in cell surface molecules involved in migration, adhesion and immunogenicity, allowed  
29 us to hypothesize that endMSCs\* may have an optimal homing and migration capacity towards  
30 inflammatory lesions. Secondly, the analysis of miRNAs, target genes and the subsequent  
31 lymphocyte activation assays demonstrated that IFN $\gamma$ /TNF $\alpha$ -primed secretome may exert a potent  
32 effect on the regulation of adverse inflammatory reactions.

## 33 Introduction

34 Mesenchymal stromal cells (MSCs) are multipotent fibroblast-like plastic-adherent cells (1) that can  
35 be isolated from various pre- and post-natal tissues (2), being the endometrium among them.  
36 Endometrial-derived MSCs (hereinafter referred to as endMSCs) can be isolated from biopsies  
37 containing the endometrial *stratum functionalis* and *stratum basalis*, or from menstrual fluid (3).  
38 These cells can be further purified by plastic adherence and *in vitro* expanded using standard culture  
39 conditions (4). The scientific literature has also described different stem/progenitor cells in the three  
40 tissue layers of endometrium (5–7) and how to isolate them using different procedures (8–10).  
41 Isolation from menstrual blood is a non-invasive and reproducible method (5) that allows the  
42 retrieval of MSCs fulfilling the minimal criteria proposed by the International Society of Cellular  
43 Therapy. Firstly, they have plastic adherence in tissue culture. Secondly, they display a CD105+,  
44 CD73+, CD90+, CD45-, CD34-, CD14-, and HLA-DR- phenotype. Third, they possess an *in vitro*  
45 differentiation capacity towards osteoblasts, adipocytes and chondroblasts (11).

46 MSCs have well-known immunomodulatory and regenerative properties (12), being used in  
47 preclinical and clinical trials (13). Moreover, these endMSCs have also demonstrated an  
48 immunosuppressive activity (14–16), as wells as anti-apoptotic and pro-angiogenic capacities (17)  
49 which are mediated by paracrine factors. In this paracrine activity, secretome is necessary for  
50 intercellular communication and comprise extracellular vesicles (EVs), exosomes, proteins, nucleic  
51 acids, and lipids with therapeutic potential.

52 Many strategies to improve the regenerative effects and efficacy of secretome components have been  
53 recently proposed and reviewed (18,19). Basically, the main idea is to optimize *in vitro* culture  
54 conditions and provide stimuli (the so-called “priming” or “licensing”) to use MSCs as “cell  
55 factories”. In this process, the “manufactured products” are therapeutically bioactive vesicles.  
56 Nowadays, most of the priming strategies have been optimized using MSCs derived from bone  
57 marrow, from umbilical cord, or adipose tissue (19). These priming strategies have been evaluated  
58 using different cytokines, such as IL17A, IL1 $\beta$ , FGF2, TNF $\alpha$ , and IFN $\gamma$  (20–24); different molecules,  
59 such as LL37, Lipopolysaccharide (LPS), Polyinosinic: polycytidylic acid (Poly (I:C)), curcumin,  
60 oxytocin, and melatonin (25–28); different chemical agents such as 5-aza-2'-deoxycytidine, valproic  
61 acid, and sphingosine-1-phosphate (29–31); and different hypoxia conditions (32–36). Additionally,  
62 all these priming strategies have been combined and optimized using different concentrations of the  
63 priming agent. For example, LPS has been used in combination with TNF $\alpha$  (21) or Poly(I:C) in  
64 MSCs with effects on cytokine secretion (37).

65 There are plenty of studies focused on the MSC-priming strategy with very different purposes:  
66 induction of angiogenesis, regeneration, or cell viability. In this study, we have evaluated different  
67 priming strategies to enhance the immunomodulatory capacity of secretomes from endMSCs.  
68 Moreover, the immunomodulatory effect of their secreted vesicles has already been demonstrated by  
69 our group (38), and additional studies allowed us to understand, at least in part, the complexity of the  
70 molecular networks and their effects on target cells (39).

71 There are several publications focused on the analysis of IFN $\gamma$ - and TNF $\alpha$ -primed cells. In two of  
72 them, authors demonstrated an upregulation of indoleamine 2,3-dioxygenase (IDO1) (40), which is  
73 mediated by chromatin remodeling at the *IDO1* promoter (41). Moreover, an inhibition of

74 complement activation by factor H has been described (42). It is important to note that these  
75 publications analyzed the effect of priming upon cells, but not upon the secreted vesicles.

76 On the other hand, priming strategies using IFN $\gamma$  and TNF $\alpha$  have also been widely studied for  
77 secretome based therapies. Here we summarize some studies focused on the analysis of secretomes  
78 by IFN $\gamma$ /TNF $\alpha$ -primed MSCs. In the case of IFN $\gamma$ , EVs from IFN $\gamma$ -primed MSCs have been found to  
79 enhance macrophage bacterial phagocytosis (43) and membrane particles obtained from IFN $\gamma$ -primed  
80 MSCs can induce an increase of anti-inflammatory PD-L1 monocytes (44). In the case of TNF $\alpha$ , EVs  
81 from TNF $\alpha$ -primed MSCs showed a therapeutic effect in urethral fibrosis (45), an improvement in  
82 the proliferation and differentiation of osteoblasts (46), as well as neuroprotective effects (47). In the  
83 case of priming strategies using the combinations of IFN $\gamma$ /TNF $\alpha$ , *in vitro* studies have revealed that  
84 IFN $\gamma$ /TNF $\alpha$ -primed MSCs produced EVs with a heightened immunomodulatory potential due to  
85 prostaglandin E2 and cyclooxygenase 2 pathway alteration (48). Priming MSCs with IFN $\gamma$ /TNF $\alpha$   
86 also shifted macrophages polarization from M1 to M2 by miRNAs (49) and resulted in  
87 immunomodulatory EVs which induced M2 differentiation and enhancement of Tregs (50). All these  
88 studies suggest that IFN $\gamma$  and TNF $\alpha$  have an enormous potentiality to act as priming agents for  
89 MSCs.

90 According to our previous studies (38,39) and considering all preceding findings in different MSCs,  
91 the aim of this study was to evaluate different priming strategies in endMSCs. Our results firstly  
92 revealed a synergistic and additive effect of IFN $\gamma$  and TNF $\alpha$  that significantly triggered the release of  
93 IDO1. Secondly, these cytokines significantly contributed to phenotypic changes in molecules  
94 involved in migration, adhesion, and immunogenicity. Third, IFN $\gamma$ /TNF $\alpha$ -primed endMSCs  
95 (endMSCs\*) deliver miRNAs which target inflammation-related genes. Finally, *in vitro* functional  
96 assays have demonstrated the immunomodulatory capacity of these vesicles.

97 To our knowledge, this is the first report focused on the optimization of priming strategies in  
98 endMSCs. Our results have demonstrated that IFN $\gamma$ /TNF $\alpha$  priming have a profound impact on the  
99 immunomodulatory potential of released vesicles and miRNAs profile of these secretomes, as well as  
100 in the migration/adhesion capacity of these cells. Altogether, these results may have clinical  
101 implications for the therapeutic use of secretomes in inflammatory mediated-diseases.

## 102 **Material and Methods**

### 103 **Isolation, culture, and characterization of human endMSCs**

104 A summary of all the experimental procedures is shown in Figure 1. Written informed consent was  
105 obtained from human menstrual blood donors and approved by the Ethics Committee of the Jesús  
106 Usón Minimally Invasive Surgery Center. Human menstrual blood samples were collected by three  
107 healthy pre-menopausal women and endMSCs were isolated under sterile conditions according to a  
108 previously described protocol (38). Following a 1:2 dilution and homogenization of the menstrual  
109 blood in phosphate buffered saline (PBS), a first centrifugation at 450  $\times$  g for 10 min was carried out.  
110 The pelleted cells were recovered and seeded in Dulbecco's Modified Eagle's medium (DMEM)  
111 containing 10% fetal bovine serum (FBS) (Gibco, Thermo Fisher Scientific, Bremen, Germany), 1%  
112 penicillin/streptomycin, and 1% glutamine, at 37 °C and 5% CO $_2$ . The adherent endMSCs were  
113 cultured to 80% confluency, onto tissue culture flasks, while the non-adherent cells were discarded

114 after 24 h. The cell culture medium was replaced every 3 or 4 days. The cells were detached from  
115 tissue culture flasks using PBS containing 0.25% trypsin (Lonza, Gaithersburg, MD, USA). The  
116 isolated endMSCs were characterized by flow cytometry and differentiation assay, as in our previous  
117 studies (38,39,51).

### 118 **Priming of endMSCs and IDO1 quantification by ELISA**

119 Different lineages of *in vitro* cultured endMSCs (n = 3) were primed using a combination of  
120 recombinant pro-inflammatory cytokines and Toll-like receptors (TLR) ligands: IFN $\gamma$  (Miltenyi  
121 Biotec Inc, San Diego, CA, USA) at 1 ng/ml and 100 ng/ml, TNF $\alpha$  (Miltenyi Biotec Inc) at 1 ng/ml  
122 and 100 ng/ml, LPS (Sigma, St. Louis, MO, USA) at 1 ng/ml and Poly (I:C) (Miltenyi Biotec Inc) at  
123 1 ng/ml. At day 3, supernatants from *in vitro* primed endMSCs were collected to evaluate the release  
124 of IDO1. According to the manufacturer's instructions, the IDO1 levels were quantified by ELISA  
125 (R&D SYSTEMS, Minneapolis, USA).

### 126 **Phenotypic surface markers and comparison of endMSCs and endMSCs\***

127 The phenotypic analysis of the cells was performed by flow cytometry using a panel of human  
128 monoclonal antibodies (Supplementary table 1). The endMSCs at passages 5–7 and 80% confluence,  
129 were *in vitro* cultured devoid of recombinant IFN $\gamma$  and TNF $\alpha$  (endMSCs, n = 3) or with 100 ng/ml  
130 IFN $\gamma$  and 100 ng/ml TNF $\alpha$  for 72 h (endMSCs\*, n = 3). The endMSCs and endMSCs\* were detached  
131 from tissue culture flasks using PBS containing 0.25% trypsin and incubated with different  
132 antibodies for 30 min at 4 °C in PBS with 2% of FBS. Cells were then washed, resuspended in PBS  
133 and acquired in a FACSCalibur™ cytometer (BD Biosciences, San Jose, CA, USA) equipped with  
134 CellQuest software (BD Biosciences). Detached cells were incubated with the Fluorescence Minus  
135 One Control (FMO control) to properly compensate the flow cytometry data. Mean fluorescence  
136 intensities (MFI) and standard deviations (SD) of positive and negative populations were taken into  
137 consideration to calculate the Stain Index (SI) as follows:  $MFI(\text{positive population}) - MFI(\text{negative}$   
138  $\text{population}) / 2 \times SD(\text{negative population})$ .

139 Phenotypic profiles of endMSCs and endMSCs\* were compared. Significant differentially expressed  
140 proteins underwent enrichment and biological pathway analyses with Cytoscape (version 3.7.2) (52),  
141 which includes the Gene Ontology Resource<sup>1</sup> and the Reactome Pathway Database<sup>2</sup>.

### 142 **Isolation, purification, and quantification of Secretomes.**

143 The endMSCs (n = 3) and endMSCs\* (n = 3) (obtained as mentioned above) at passages 6–12 and  
144 80% confluence were used for secretome collection. Cell culture medium (with or without IFN $\gamma$  and  
145 TNF $\alpha$ ) was replaced by DMEM, 1% penicillin/streptomycin, 1% glutamine and 1% insulin-  
146 transferrin-selenium (Thermo Fisher Scientific, MA, USA), after rinsing with PBS. Cells were then  
147 cultured during 72 h at 37 °C and 5% CO<sub>2</sub>, conditioned media were collected for the concentration of

---

<sup>1</sup> <http://geneontology.org/>

<sup>2</sup> <https://reactome.org/>

148 secretomes. Cells were detached with trypsin and counted with Neubauer chamber. Viability was 168  
149 evaluated though Trypan blue staining (Thermo Scientific).

150 Condition media from endMSCs and endMSCs\* were centrifuged first at  $1000 \times g$  10 min  $4^\circ\text{C}$ , then  
151 at  $5000 \times g$  20 min  $4^\circ\text{C}$ . Pellets were discarded and the supernatants were filtered through  $0.45 \mu\text{m}$   
152 and  $0.22 \mu\text{m}$  mesh (Fisher Scientific, Leicestershire, UK) to eliminate dead cells and debris. To  
153 concentrate the condition media, up to 15 ml filtered supernatants were ultra-filtered through a 3 kDa  
154 MWCO Amicon® Ultra device (Merck-Millipore, MA, USA) by centrifugation at  $4000 \times g$  for 1 h at  
155  $4^\circ\text{C}$ . The concentration of proteins from enriched secretomes was quantified by Bradford assay (Bio  
156 Rad Laboratories, Hercules, CA). Finally, the secretomes from endMSCs (S-endMSCs) and  
157 endMSCs\* (S-endMSCs\*) were stored at  $-20^\circ\text{C}$  for further analyses.

### 158 **miRNAs analysis by Next Generation Sequencing**

159 miRNA sequencing experiments were performed at QIAGEN Genomic Services (Hilde, Germany).  
160 Total RNA was isolated from 1 ml of each concentrated sample, using the exoRNeasy Serum/Plasma  
161 Kit (QIAGEN) according to manufacturer's instructions. During the sample preparation, QC Spike-  
162 ins were added as quality control. A total of  $5 \mu\text{l}$  of purified RNA tagged with adapters containing a  
163 Unique Molecular Index (UMIs) was converted into cDNA NGS libraries using the QIAseqmiRNA  
164 Library Kit (QIAGEN). cDNA was amplified in 22 cycles of PCR and purified. Library preparation  
165 QC was performed using Bioanalyzer 2100 (Agilent). Libraries were pooled in equimolar ratios,  
166 based on quality of the inserts and the concentration measurements. They were then quantified by  
167 quantitative polymerase chain reaction (qPCR) and sequenced on a NextSeq500/550 System  
168 (Illumina, San Diego, CA, USA) according to the manufacturer instructions. Raw data was converted  
169 to FASTQ files for each sample using the bcl2fastq software (Illumina, Inc.). Quality control of raw  
170 sequencing data was checked using the FastQCtool<sup>3</sup>. The data analyses, which included filtering,  
171 trimming, mapping, quantification, and normalization, were carried out using CLC Genomics  
172 Workbench (version 20.0.2) and CLC Genomics Server (version 20.0.2). The human genome version  
173 GRCh38 was used as a reference database to annotate the miRNAs. The read sets were aligned to the  
174 reference sequences from miRbase (version 22). The differential expression between S-endMSCs and  
175 S-endMSCs\* was evaluated through the EDGE (Empirical analysis of Differential Gene Expression)  
176 analysis within the CLC bio.

177 Using Benjamini-Hochberg FDR corrected  $p$  values, differentially expressed miRNAs at significance  
178 level of .05 (FDR) were selected for unsupervised analysis (principal component analysis -PCA-,  
179 clustering, and heat map) using ClustVis (version 2.0)<sup>4</sup>. Enrichment analysis of these miRNAs was  
180 performed using miRNet (version 2.0)<sup>5</sup> and TAM (version 2.0)<sup>6</sup>. Moreover, significantly  
181 overexpressed miRNAs in S-endMSCs\* were submitted to a miRTargetLink<sup>7</sup> analysis to determine

---

<sup>3</sup><http://www.bioinformatics.babraham.ac.uk/projects/fastqc/>

<sup>4</sup><https://biit.cs.ut.ee/clustvis/>

<sup>5</sup><https://www.mirnet.ca/>

<sup>6</sup><http://www.lirmed.com/tam2/>

<sup>7</sup><https://ccb-web.cs.uni-saarland.de/mirtargetlink/>



182 the human target genes of these miRNAs. Results were filtered to strong experimental evidence.  
183 Only genes included into the Gene Ontology category of *Inflammation Response* (GO:0006954) were  
184 taken into consideration. Enrichment analysis of these genes was performed using FunRich:  
185 Functional Enrichment analysis tool (version 3.1.3) (53,54). Target genes were sub-classified in four  
186 categories: *Innate Immune Response* (GO:0045087), *Adaptive Immune Response* (GO:0002250),  
187 *Positive Regulation of Inflammatory Response* (GO:0050728), and *Negative Regulation of*  
188 *Inflammatory Response* (GO:0050729). The datasets discussed in this publication have been  
189 deposited in Sequence Read Archive (SRA) data with the accession number PRJNA664968<sup>8</sup>.

## 190 **Immunomodulatory assays on *in vitro* stimulated peripheral blood lymphocytes**

191 Human peripheral blood lymphocytes (PBLs) from a healthy donor were stimulated using the T Cell  
192 Activation/ Expansion Kit (MACS, Miltenyi Biotec, USA) according to manufacturer instructions.  
193 Briefly, PBLs in RPMI-1640 medium supplemented with T Cell Activation/ Expansion Kit and 10%  
194 FBS were cultured in U-bottom 96 wells plate at  $4 \times 10^5$  cells per well. S-endMSCs and S-endMSCs\*  
195 were added to PBLs at 20, 40, and 80  $\mu\text{g/ml}$ , in accordance with protein concentrations resulting  
196 from the Bradford assay. At day 3 and day 6, *in vitro* stimulated PBLs were analyzed by flow  
197 cytometry. PBLs without stimulation were used as negative control. *In vitro* stimulated PBLs without  
198 secretomes were used as positive controls. For flow cytometry analyses, PBLs were collected and  
199 incubated for 30 min at 4 °C with fluorescence-labeled human monoclonal antibodies against: CD4,  
200 CD8, CD45RA, and CD62L (BD Biosciences), in the presence of PBS containing 2% of FBS. Cells  
201 were then washed and resuspended in PBS. The flow cytometric analysis was performed on CD4+ T  
202 cells, and CD8+ T cells, and the percentage of gated CD45RA-/CD62L- cells allowed us to quantify  
203 the percentage of effector-memory cells.

## 204 **Statistical analysis**

205 Data were statistically analyzed with GraphPad Prim (version 8.0) using paired *t* test for variables  
206 with parametric distribution and Wilcoxon test for non-parametric data. The  $p \leq .05$  were considered  
207 statistically significant.

## 208 **Results**

### 209 **Characterization of *in vitro* isolated and expanded endMSCs**

210 A more detailed description of endMSC characterization can be found in our previous studies  
211 (38,39,51). Briefly, our endMSCs were plastic-adherent when maintained in standard culture  
212 conditions and their differentiation toward the adipogenic, chondrogenic, and osteogenic lineages  
213 was demonstrated by specific staining. The phenotypic analysis of *in vitro* expanded endMSCs  
214 revealed a positive expression for the surface markers CD44/CD73/CD90/CD105, and negative for  
215 CD14/CD20/CD34/CD45/CD80/HLA-DR. The cell lines used for this study complied with the  
216 Minimal criteria for defining multipotent mesenchymal stromal cells (11).

---

<sup>8</sup> <http://www.ncbi.nlm.nih.gov/bioproject/664968>

## 217 **Effect of endMSCs priming on IDO1 release.**

218 In order to enhance the immunomodulatory capacity of secretomes from endMSCs, different pro-  
219 inflammatory cytokines (TNF $\alpha$ , IFN $\gamma$ ) and TLR ligands (LPS, Poly (I:C)) were evaluated under *in*  
220 *vitro* conditions. The release of IDO1 by endMSCs was used as a primary biomarker for the  
221 immunomodulatory potential (55). Results obtained by ELISA firstly demonstrated an increase in  
222 IDO1 release when endMSCs were primed with 100 ng/ml of IFN $\gamma$ . The significant increase was also  
223 observed when 100 ng/ml of IFN $\gamma$  were combined with LPS and/or Poly (I:C) at 1 ng/ml. In the case  
224 of IFN $\gamma$  at low concentrations (1 ng/ml), alone or in combination, the release of IDO1 was not  
225 increased when compared to control conditions.

226 Interestingly, the combination of 100 ng/ml IFN $\gamma$  and 100 ng/ml TNF $\alpha$  achieved the highest level of  
227 IDO1 release (Figure 2). These results demonstrated a synergistic effect of IFN $\gamma$  and TNF $\alpha$  on the  
228 immunomodulatory potential of endMSCs. Hence, endMSCs under these *in vitro* culture conditions  
229 were characterized in terms of surface marker expression, and their secretomes were concentrated  
230 and characterized.

## 231 **Phenotypic profile of surface markers on endMSCs**

232 endMSCs (n = 3) and endMSCs\* (n = 3) phenotype was analyzed by flow cytometry using a large  
233 panel (n = 40) of monoclonal antibodies toward various cell surface markers (Supplementary Table  
234 1). Our phenotypic analysis revealed a statistically significant difference in 9 out of 40 surface  
235 markers between endMSCs and endMSCs\* (Figure 3A).

236 The following markers were significantly increased in endMSCs\*: CD49e, CD54, CD56, CD58,  
237 CD63, CD126, CD152, and CD274. Uniquely, CD49d was significantly reduced in IFN $\gamma$ /TNF $\alpha$ -  
238 primed cells (Figure 3B). Finally, differentially expressed antigens were classified according to Gene  
239 Ontology and Reactome Pathways. Our results revealed the classification of these markers in *Immune*  
240 *System Process* (GO:0002376) (CD54, CD49e, CD152, CD126, CD58, CD274, CD49d, CD63,  
241 CD56), *Cell Adhesion* (GO:007155) (CD54, CD49e, CD58, CD49d, CD63, CD56), *Cell Migration*  
242 (GO:0016477) (CD54, CD49e, CD126, CD58, CD49d, CD63), and *Response to Cytokine*  
243 (GO:0034097) (CD54, CD126, CD58, CD274, CD49d, CD56). The analysis by Reactome Biological  
244 Pathways demonstrated a classification in *Immune System* (HSA-168256) (CD54, CD152, CD126,  
245 CD58, CD274, CD49d, CD63, CD56), *Adaptive Immune System* (HSA-1280218) (CD54, CD152,  
246 CD274, CD49d), *Cytokine Signaling in Immune system* (HSA-1280215) (CD54, CD126, CD56), and  
247 *Integrin cell surface interactions* (HSA-216083) (CD54, CD49e, CD49d) (Figure 3C).

## 248 **Effects of IFN $\gamma$ /TNF $\alpha$ priming in S-endMSCs microRNAome**

249 Particle size of secretomes was determined by nanoparticle tracking analysis. Particle diameter was  
250  $153.5 \pm 63.05$  nm, as already reported in one of our previous studies (39). A microRNAome NGS  
251 analysis was performed on concentrated S-endMSCs (n = 3) and S-endMSCs\* (n = 3). A total of 628  
252 miRNAs were identified from S-endMSCs. Supplementary Table 2 shows the expression in counts  
253 per millions (CPM) of top ten abundant miRNAs in the secretomes. Additionally, the comparison of  
254 the normalized and filtered expression values of CPM revealed that 40 of them (6.37%) were  
255 significantly different when S-endMSCs and S-endMSCs\* were compared (*p* value adjusted by  
256 Benjamini-Hochberg FDR correction  $\leq .05$ ). The top ten of miRNAs with the highest fold change

257 were hsa-miR-155-5p, hsa-miR-361-3p, hsa-miR-376a-3p, hsa-miR-424-3p, hsa-miR-27a-3p, hsa-  
258 miR-210-3p, hsa-miR-21-3p, hsa-miR-490-3p, hsa-miR-26a-2-3p, and hsa-miR-181a-5p  
259 (Supplementary Table 3).

260 Our results demonstrated that, 25 out of 40 significantly differentially expressed miRNAs (62.5%)  
261 were up-regulated in S-endMSCs\*. These 25 miRNAs were selected for further analyses  
262 (unsupervised analysis and Gene Ontology enrichment analysis). To address the differences in  
263 miRNAome profile between the S-endMSCs\* and S-endMSCs, unsupervised principal component  
264 analysis was used to study the potential clusters of these S-endMSCs based on the detected miRNAs.  
265 The result of the PCA indicated that each condition exhibited a unique miRNA profile, allowing a  
266 separation into well differentiated clusters (Figure 4A). The heat map-based unsupervised  
267 hierarchical clustering analysis showed the differences in these 25 miRNAs (Figure 4B) and  
268 corroborated the PCA analysis.

269 Gene Ontology enrichment analysis was performed to classify these up-regulated miRNAs. For this  
270 analysis, miRNet and TAM 2.0 software were used. Several biological processes turned out to be  
271 enriched, being the most relevant the terms: *Inflammatory Response* (GO:0006954) (64%), *Immune*  
272 *Response* (GO:0006955) (48%), *Cell Death* (GO:0008219) (48%), *Cell Aging* (GO:0007569) (44%),  
273 *Cell Cycle* (GO:0007049) (36%), *Innate Immune Response* (GO:0045087) (32%), *Cell Proliferation*  
274 (GO:0008283) (28%), *Cell Differentiation* (GO:0030154) (24%), *Angiogenesis* (GO:0001525)  
275 (24%), and *T-helper 17 Cell Differentiation* (GO:0072539) (20%).

## 276 **miRNA Target Prediction in Inflammatory Response**

277 According to microRNAome results, the up-regulated miRNAs were subsequently analyzed for  
278 determining the miRNA target genes using human miRTargetLink. Only miRNA-target interactions  
279 with strong experimental evidence were included. Our results demonstrated that, 105 genes were  
280 identified as miRNA targets (a total of 6 miRNAs were excluded because of a lack of connections).  
281 An enrichment analysis, carried out with FunRich, revealed that 22 genes out of 105 were included  
282 into Gene Ontology category of *Inflammation Response* (GO:0006954). These genes were sub-  
283 classified in four categories: *Innate Immune Response* (GO:0045087), *Adaptive Immune Response*  
284 (GO:0002250), *Positive Regulation of Inflammatory Response* (GO:0050728), and *Negative*  
285 *Regulation of Inflammatory Response* (GO:0050729). Some genes belonged to more than one  
286 category. The classification showed that 8 target genes were categorized in *Innate Immune Response*  
287 (*CD44*, *IFNG*, *PIK3CG*, *CSF1R*, *ICAM1*, *XIAP*, *APOE*, *NFKB1*), 6 target genes were categorized in  
288 *Positive Regulation of Inflammatory Response* (*PTGS2*, *IFNG*, *PIK3CG*, *ETS1*, *CEBPB*, *EGFR*), 5  
289 target genes were categorized in *Negative Regulation of Inflammatory Response* (*IGF1*, *ETS1*,  
290 *APOE*, *KLF4*, *NFKB1*), and 4 target genes were categorized in *Adaptive Immune Response* (*BCL6*,  
291 *IFNG*, *PIK3CG*, *ICAM1*). Moreover, the genes: *ATM*, *KIT*, *FOS*, *SELE*, *SMAD1*, *NOTCH1*, and  
292 *HIF1A* were not included in these sub-categories. Finally, a Protein-miRNA Interaction Networks  
293 with 35 nodes and 51 edges were built using Cytoscape software (Figure 5).

## 294 **Immunomodulatory assay of secretomes against *in vitro* stimulated lymphocytes**

295 In order to evaluate the immunomodulatory effect of extracellular vesicles against *in vitro* stimulated  
296 lymphocytes, PBLs from a healthy donor were stimulated with anti-CD2, anti-CD3, and anti-CD28



297 beads. This stimulation partially mimics antigen-mediated activation and trigger the differentiation of  
298 CD4<sup>+</sup> and CD8<sup>+</sup> T cells towards effector-memory T cells (CD45RA<sup>-</sup>/CD62L<sup>-</sup>).

299 Lymphocyte activation assays were performed co-culturing PBLs in the presence of secretomes at  
300 20, 40, and 80 µg/ml for 3 and 6 days. The most relevant results were obtained at day 6 with a  
301 secretome concentration of 40 µg/ml. The phenotype of *in vitro* stimulated T cells after co-culture  
302 with secretome 40 µg/ml at 6 days is shown in Figure 6. As expected, S-endMSCs\* triggered a  
303 significant decrease in the percentage of CD4<sup>+</sup> effector memory T-cells when compared to *in vitro*  
304 stimulated PBLs devoid of secretomes ( $p = .0428$ ) and to S-endMSCs ( $p = .0313$ ) (Figure 6A and  
305 6C). Additionally, S-endMSCs\* produced a significant decrease in the percentage of CD8<sup>+</sup> effector  
306 memory T-cells when compared to *in vitro* stimulated PBLs ( $p = .0043$ ) and to S-endMSCs ( $p =$   
307  $.0283$ ) (Figure 6B and 6D). The percentage of effector-memory T cells was determined as the  
308 percentage of CD45RA<sup>-</sup>/CD62L<sup>-</sup> cells on FSC/SSC-gated cells.

## 309 Discussion

310 Secretome derived from MSCs have become a promising tool for the regulation of adverse  
311 inflammatory events and to support regenerative processes. Among secretome sources, endometrial  
312 MSCs derived from menstrual blood (endMSCs) present many advantages: they can be obtained by  
313 non-invasive procedures, from multiple donors and without ethical concerns. Isolating and expanding  
314 these cells is easy and feasible, guaranteeing high growth rates in relatively short time (56). In earlier  
315 studies, we have demonstrated that their secreted vesicles had an immunomodulatory effect on CD4<sup>+</sup>  
316 T cells (38). In addition, proteomic/genomic analyses revealed the presence of proteins and miRNAs  
317 involved in immunomodulatory pathways (39).

318 Here we aimed to improve *in vitro* culture conditions to enhance the immunomodulatory capacity of  
319 secretomes from endMSCs, and hence, their therapeutic effectiveness. According to bibliography,  
320 different priming -or licensing- strategies to enhance the immunomodulatory capacity of MSCs have  
321 been proposed (57). Pro-inflammatory cytokines, hypoxia, biological or chemical agents have been  
322 successfully used to enhance the immunomodulatory capacity against immune cells such as T cells,  
323 B cells, NK cells, neutrophils or dendritic cells (18,19). It should be pointed out that most of these  
324 results were obtained under *in vitro* conditions and several concerns about using these licensed cells  
325 in clinical settings have arisen. As an example, they may allow tumor development of pre-existing  
326 malignant cells (58).

327 Based on this idea, our first sets of experiments were focused on the optimization of priming  
328 conditions. IFN $\gamma$ , TNF $\alpha$ , Poly (I:C), and LPS (separately or in combination) were used. For these  
329 experiments, IDO1 secretion was considered an “immunomodulatory biomarker” and allowed us to  
330 compare the efficiency of different priming conditions. It is important to note that, this enzyme has  
331 been also considered by other authors as a “potency marker” for MSC-mediated immune suppression  
332 (59). Our experimental conditions revealed that IFN $\gamma$  itself enhanced the release of IDO1, which is in  
333 agreement with *in vitro* studies using adipose-derived MSCs (60). Additionally, it has been recently  
334 demonstrated that IFN $\gamma$  causes chromatin remodeling at the IDO1 promoter increasing the mRNA  
335 levels (41). Our results were remarkable when IFN $\gamma$  was combined with TNF $\alpha$ . These cytokines  
336 showed a synergistic effect and evidently increased the release of IDO1 from endMSCs. Although

337 the combination of these two cytokines is not new, and it has been already used to induce the  
338 immunomodulatory activity of MSCs (49,50), this the first report using MSCs from menstrual blood.

339 Using IDO1 as immunomodulatory biomarker, endMSC priming conditions were optimized. Hence,  
340 the next set of experiments was conducted to characterize the phenotype of IFN $\gamma$ /TNF $\alpha$ -primed cells.  
341 In this analysis, a large panel of surface markers (n = 40) was analyzed to compare endMSCs\* and  
342 endMSCs. As expected, endMSCs were positive for CD44, CD73, CD90, and CD105 with low levels  
343 of MHC class I molecule and negative expression of MHC class II. The statistics and paired  
344 comparisons revealed that 9 out of 40 surface markers were significantly increased in endMSCs\*.  
345 Most of these markers were classified by Gene Ontology and Reactome in the categories *Immune*  
346 *System Process* (GO:0002376) and *Immune system* (R-HSA-168256) respectively.

347 It is important to discuss the significant differences observed in some of these molecules. NCAM-1  
348 (CD56) is an adhesion molecule expressed in bone marrow-derived MSCs and associated with their  
349 migration and homing capacity (61). The surface molecule ICAM-1 (CD54) in MSCs promotes MSC  
350 homing to the focus of inflammation and immune organs (62) and its increased expression has been  
351 correlated with an immunomodulatory effect on dendritic cells (63). The expression of LFA3 (CD58)  
352 has been also described in bone marrow-derived MSCs and interacts with their ligands on T cells  
353 (64). Considering that preclinical and clinical studies have demonstrated that the homing/migration  
354 of systemically administered MSCs is very low (66), the increased expression of adhesion molecules  
355 ICAM-1, CD58, and NCAM-1 in IFN $\gamma$ /TNF $\alpha$ -primed cells may improve homing and migration  
356 capacity to a target tissue.

357 Apart from adhesion molecules, our phenotypic analysis was also focused on immune checkpoint  
358 receptors such as CTLA4 (CD152) and PD-L1 (CD274). Here we demonstrate a significant increase  
359 of the inhibitory molecule CTLA4 (CD152) under IFN $\gamma$ /TNF $\alpha$  priming. The expression of this  
360 protein has been previously described in the membrane of bone marrow-derived MSCs and its  
361 soluble form is released under hypoxic conditions (67). In our study, we also found a significant  
362 increase of CTLA4 in endMSCs\*, which may have an immunomodulatory role by blocking CD28  
363 co-stimulation on T cells. Similarly to CTLA4, we found that PD-L1 (CD274) was also increased  
364 after IFN $\gamma$ /TNF $\alpha$  priming. This result is coincident with previous studies where bone marrow-derived  
365 MSCs express and secrete PD-L1 (CD274), that can be inducible under IFN $\gamma$  and TNF $\alpha$  (68). The  
366 surface expression and inflammatory-mediated induction of CTLA4 and PD-L1 suggests that these  
367 molecules could be involved in the modulation of T cells and peripheral tolerance.

368 Finally, IL6R (CD126) emerged from our phenotypic analysis. endMSCs as adipose-derived MSCs  
369 (69) did not express -or had a very low expression of- CD126. Previous studies have demonstrated  
370 that CD126 cannot be induced in adipose-derived MSCs (using IFN $\gamma$  or TGF $\beta$ ) (69). In contrast, in  
371 our experimental conditions we found a significant increase of CD126. The expression of IL6/IL6R  
372 has been correlated with the osteogenic (70) and adipogenic (71) differentiation of bone marrow-  
373 derived MSCs. Here we assume that the increase of CD126 may also reflect an increased  
374 susceptibility of endMSCs to IL6-mediated inflammation.

375 The second aim of this study was to analyze the secretomes from endMSCs\*. As previously  
376 discussed, our group recently demonstrated the involvement of miRNAs in immunomodulatory  
377 pathways (39). Therefore, we hypothesized that IFN $\gamma$ /TNF $\alpha$  may trigger the release of miRNAs that

378 target genes from inflammation and innate/adaptive immune responses. The analysis by NGS  
379 allowed us to identify a set of significantly increased ( $n = 25$ ) and significantly decreased ( $n = 16$ )  
380 miRNAs following  $\text{IFN}\gamma/\text{TNF}\alpha$ -priming. According to our previous studies, three of them were also  
381 significantly expressed when using  $\text{IFN}\gamma$  alone for priming endMSCs: hsa-miR-146b-5p, hsa-miR-  
382 376c-3p, and hsa-miR-490-3p (39). Similarly, here we confirm our previous findings which  
383 demonstrated that hsa-miR-143-3p, hsa-miR-199a-3p, hsa-let-7b-5p, hsa-miR-21-5p, hsa-miR-16-5p,  
384 hsa-let-7a-5p, and hsa-let-7f-5p, are the most abundant miRNAs in secretomes (39).

385 It is interesting to note that the PCA of NGS results evidenced the significant differences among  
386 secretomes under standard culture conditions and secretomes from endMSCs\*. These results  
387 highlight the importance of cell culture conditions in the secretome release, and how inflammatory  
388 priming conditions determine the miRNAs content. Although some of these miRNAs may deserve a  
389 long discussion, we have focused our interest on those miRNAs which are significantly increased and  
390 target inflammatory-related genes.

391 The miRTargetLink analysis (72,73) allowed us to identify multiple query nodes on significantly  
392 increased miRNAs. The increase of hsa-miR-155-5p (log fold change = 5.05 and  $p = .00009$ ) is  
393 especially relevant, since it targets genes involved in *Innate/Adaptive Immune Response*, such as  
394 *CSF1R*, *ICAM1* or *BCL6*. This result agrees with a recent study from E. Ragni et al., who  
395 demonstrated that miR-155-5p is overexpressed in extracellular vesicles from  $\text{IFN}\gamma$ -primed adipose-  
396 derived MSCs (74). Similarly, an enhancement of miR-155-5p was previously reported in bone  
397 marrow-derived MSCs under  $\text{IFN}\gamma/\text{TNF}\alpha$  stimulation, with the authors suggesting that this miRNA  
398 could inhibit the immunosuppressive capacity of MSCs by reducing the iNOS production (75). In  
399 contrast, a recent *in vitro* study using inhibitors of miR-155-5p in bone marrow-derived MSCs from  
400 rats demonstrated that miR-155-5p enhanced the differentiation of T cells towards Th2 and Treg cells  
401 (76). Based on our *in vitro* assays using *in vitro* stimulated T cells co-cultured with secretomes, we  
402 believe that miR-155-5p could be involved in the inhibition of T cell activation. Obviously, future  
403 studies must be conducted to validate this hypothesis.

404  
405 The increase of hsa-miR-27a-3p was also significant in S-endMSCs\* (log fold change = 4.35 and  $p =$   
406  $.000005$ ). This miRNA has been recently described in extracellular vesicles derived from MSCs, and  
407 more importantly, it has been found to be transferred from vesicles to macrophages promoting M2  
408 macrophage polarization (77). Furthermore, according to miRTargetLink, the gene *IFNG* is a target  
409 of hsa-miR-27a-3p, and this miRNA has been found to be involved in the regulation of *IRAK4*, a  
410 promoter of *NF- $\kappa$ B* (78), which regulate inflammatory and immune genes.

411  
412 In the case of hsa-miR-21-3p and hsa-miR-490-3p, these miRNAs were abundantly expressed and  
413 significantly increased in S-endMSCs under  $\text{IFN}\gamma$  priming (39). Similarly, hsa-miR-424-3p has been  
414 found to be increased in  $\text{IFN}\gamma$ -primed umbilical cord-derived MSCs (79). Regarding hsa-miR-185-  
415 5p, a recent study using EVs from MSCs have demonstrated that the enrichment of these vesicles  
416 with this miRNA alleviate the inflammatory response and reduce cell proliferation (80).

417  
418 Altogether, data analysis by NGS revealed a myriad of miRNAs which are increased and decreased  
419 in S-endMSCs\*. According to Gene Ontology, the targets for these miRNAs were found to be  
420 involved in the *regulation of inflammatory response*, so it is expected that the transference of these  
421 miRNAs to target cells may have an impact in the behavior of immune cells, and hence, in the

422 TH1/TH2 balance. Our functional studies using *in vitro* stimulated lymphocytes (that partially mimic  
423 an antigen-specific activation of T cells) could demonstrate their immunomodulatory capacity,  
424 however, further studies need to be performed to identify targeted genes in different immune cells. In  
425 a very recent study (81) equine amniotic MSCs were primed with a combination of IFN $\gamma$  and TNF $\alpha$   
426 demonstrating no additional immunosuppressive activity in an inflammatory *in vitro* model,  
427 compared to non-primed cells. Even though this study was performed with lower concentrations of  
428 IFN $\gamma$  and TNF $\alpha$  on a different type of MSCs, it remarks that further research is necessary to confirm  
429 our insights.

430 In conclusion, our results have demonstrated that IFN $\gamma$  and TNF $\alpha$  had a synergistic effect on IDO1  
431 secretion, being a strong and efficient endMSCs priming strategy. Under this priming condition,  
432 surface molecules can be modified showing an increase of adhesion molecules, cytokine receptors  
433 and immune checkpoint receptors that may alter their biodistribution as well as their  
434 immunomodulatory activity. Here we hypothesize that IFN $\gamma$ /TNF $\alpha$  may enhance the anti-  
435 inflammatory capacity of MSCs, as well as the migration/adhesion to inflammatory tissue. Finally,  
436 according to NGS and *in vitro* assays, IFN $\gamma$ /TNF $\alpha$ -priming of endMSCs produce secretomes with a  
437 potent therapeutic/immunomodulatory potential.

438

## 439 **Conflict of Interest**

440 The authors declare that this research was conducted in the absence of any commercial or financial  
441 relationships that could be construed as a potential conflict of interest.

442

443

## 444 **Data Availability Statement**

445 The datasets generated for this study can be found in Sequence Read Archive (SRA) data with the  
446 accession number PRJNA664968<sup>9</sup>.

## 447 **Author Contributions**

448 MÁP and JGC conceived and designed the experiments. MÁP, VÁ, EL, FM, MP, and JGC  
449 performed the experiments and analyzed the data. MÁP and JGC wrote the manuscript. All authors  
450 contributed to the article and approved the submitted version.

451

## 452 **Funding**

453 This study was supported by competitive grants, such as: “PFIS” contract (FI19/00041) from the  
454 National Institute of Health Carlos III (ISCIII, 2019 Call Strategic Action in Health 2019) to MÁP;

---

<sup>9</sup> <http://www.ncbi.nlm.nih.gov/bioproject/664968>

455 MAFRESA S.L. (Grupo Jorge) grant (promoted by Jesús Usón Gargallo) to FM; “Sara Borrell” grant  
456 (CD19/00048) from ISCIII to EL; grant “TE-0001-19” from Consejería de Educación y Empleo (co-  
457 funded by European Social Fund -ESF- “Investing in your future”, ayuda para el fomento de la  
458 contratación de personal de apoyo a la investigación en la Comunidad Autónoma de Extremadura to  
459 MP. Costs for experimental development were funded by grant “CB16/11/00494” from CIBER-CV  
460 and Ayuda Grupos catalogados de la Junta de Extremadura (GR18199) from Junta de Extremadura ,  
461 Consejería de Economía, Ciencia y Agenda Digital (co-funded by European Regional Development  
462 Fund – ERDF) to FS-M; JGC received fundings from the ISCIII through a “Miguel Servet I” grant  
463 (MS17/00021) co-funded by ERDF/ESF “A way to make Europe”/“Investing in your future”,  
464 funding from the projects “CP17/00021” and “PI18/0911” (co-funded by ERDF/ESF), and by Junta  
465 de Extremadura through a “IB16168” grant (co-funded by ERDF/ESF). The funders had no role in  
466 study designs, data collection and analysis, decision to publish, or preparation of the manuscript.

467

## 468 **List of abbreviations**

469 BSA, Bovine Serum Albumin; CPM, Counts Per Million; DMEM, Dulbecco's Modified Eagle's  
470 medium; EDGE, Empirical analysis of Differential Gene Expression; ELISA, Enzyme-  
471 Linked ImmunoSorbent Assay; endMSCs, Endometrial-derived stromal/Mesenchymal Stem Cells;  
472 endMSCs\*, IFN $\gamma$ /TNF $\alpha$ -primed Endometrial-derived stromal/Mesenchymal Stem Cells;  
473 endMSCs, Endometrial-derived stromal/Mesenchymal Stem Cells; EVendMSCs, Extracellular  
474 Vesicles from Endometrial-derived Mesenchymal Stromal/Stem Cells; EVs, Extracellular Vesicles;  
475 FBS, Fetal Bovine Serum; FDR, False Discovery Rate; GO, Gene Ontology;IDO1, Indoleamine 2,3-  
476 dioxygenase; IFN $\gamma$ , Interferon gamma; LPS, Lipopolysaccharide; MFI, Mean Fluorescence Intensity;  
477 FMO; Fluorescence Minus One; MSCs, Mesenchymal Stromal Cells; NGS, Next Generation  
478 Sequencing; PBLs, Peripheral blood lymphocytes; PBS, Phosphate buffered saline; PCA, Principal  
479 Component Analysis; Poly (I:C), Polyinosinic: polycytidylic acid; QPCR, Quantitative Real-Time  
480 Polymerase Chain Reaction; SD, Standard Deviation; SAR, Sequence Read Archive; S-endMSCs;  
481 Secretome from Endometrial-derived Mesenchymal Stromal/Stem Cells; S-endMSCs\*; Secretome  
482 from IFN $\gamma$ /TNF $\alpha$ -primed Endometrial-derived Mesenchymal Stromal/Stem Cells; SI, Stain Index;  
483 TLR, Toll-Like Receptor; TNF $\alpha$ , Tumor Necrosis Factor alpha; UMI, Unique Molecular Index.

484

## 485 **Acknowledgments**

486 Lymphocyte activation assays were performed by ICTS Nanbiosis (Unit 14 at CCMIJU). The authors  
487 acknowledge the contribution of Joaquín González for the technical support in figures handling.

488

## 489 **Bibliography**

- 490 1. Horwitz EM, Le Blanc K, Dominici M, Mueller I, Slaper-Cortenbach I, Marini FC, et al.  
491 Clarification of the nomenclature for MSC: The International Society for Cellular Therapy  
492 position statement. *Cytotherapy*. 2005;7(5):393–5.



- 493 2. Marquez-Curtis LA, Janowska-Wieczorek A, McGann LE, Elliott JAW. Mesenchymal stromal  
494 cells derived from various tissues: Biological, clinical and cryopreservation aspects.  
495 *Cryobiology*. 2015 Oct;71(2):181–97.
- 496 3. Bozorgmehr M, Gurung S, Darzi S, Nikoo S, Kazemnejad S, Zarnani A-H, et al. Endometrial  
497 and Menstrual Blood Mesenchymal Stem/Stromal Cells: Biological Properties and Clinical  
498 Application. *Front Cell Dev Biol*. 2020;8:497.
- 499 4. Gargett CE, Schwab KE, Deane JA. Endometrial stem/progenitor cells: the first 10 years. *Hum*  
500 *Reprod Update*. 2016 Mar;22(2):137–63.
- 501 5. Masuda H, Anwar SS, Bühring H-J, Rao JR, Gargett CE. A novel marker of human endometrial  
502 mesenchymal stem-like cells. *Cell Transplant*. 2012;21(10):2201–14.
- 503 6. Schwab KE, Gargett CE. Co-expression of two perivascular cell markers isolates mesenchymal  
504 stem-like cells from human endometrium. *Hum Reprod*. 2007 Nov;22(11):2903–11.
- 505 7. Kyurkchiev S, Shterev A, Dimitrov R. Assessment of presence and characteristics of  
506 multipotent stromal cells in human endometrium and decidua. *Reprod Biomed Online*. 2010  
507 Mar;20(3):305–13.
- 508 8. Wang H, Jin P, Sabatino M, Ren J, Civini S, Bogin V, et al. Comparison of endometrial  
509 regenerative cells and bone marrow stromal cells. *J Transl Med*. 2012 Oct 5;10:207.
- 510 9. Schüring AN, Schulte N, Kelsch R, Röpke A, Kiesel L, Götte M. Characterization of  
511 endometrial mesenchymal stem-like cells obtained by endometrial biopsy during routine  
512 diagnostics. *Fertil Steril*. 2011 Jan;95(1):423–6.
- 513 10. Lucas ES, Dyer NP, Fishwick K, Ott S, Brosens JJ. Success after failure: the role of endometrial  
514 stem cells in recurrent miscarriage. *Reprod Camb Engl*. 2016 Nov;152(5):R159-166.
- 515 11. Dominici M, Blanc KL, Mueller I, Slaper-Cortenbach I, Marini FC, Krause DS, et al. Minimal  
516 criteria for defining multipotent mesenchymal stromal cells. The International Society for  
517 Cellular Therapy position statement. *Cytotherapy*. 2006;8(4):315–7.
- 518 12. Le Blanc K, Mougiakakos D. Multipotent mesenchymal stromal cells and the innate immune  
519 system. *Nat Rev Immunol*. 2012 Apr 25;12(5):383–96.
- 520 13. Levy O, Kuai R, Siren EMJ, Bhere D, Milton Y, Nissar N, et al. Shattering barriers toward  
521 clinically meaningful MSC therapies. *Sci Adv*. 2020 Jul;6(30):eaba6884.
- 522 14. Nikoo S, Ebtekar M, Jeddi-Tehrani M, Shervin A, Bozorgmehr M, Kazemnejad S, et al. Effect  
523 of menstrual blood-derived stromal stem cells on proliferative capacity of peripheral blood  
524 mononuclear cells in allogeneic mixed lymphocyte reaction. *J Obstet Gynaecol Res*. 2012  
525 May;38(5):804–9.

- 526 15. Nikoo S, Ebtekar M, Jeddi-Tehrani M, Shervin A, Bozorgmehr M, Vafaei S, et al. Menstrual  
527 blood-derived stromal stem cells from women with and without endometriosis reveal different  
528 phenotypic and functional characteristics. *Mol Hum Reprod*. 2014 Jan 9;20(9):905–18.
- 529 16. Peron JPS, Jazedje T, Brandão WN, Perin PM, Maluf M, Evangelista LP, et al. Human  
530 endometrial-derived mesenchymal stem cells suppress inflammation in the central nervous  
531 system of EAE mice. *Stem Cell Rev*. 2012 Sep;8(3):940–52.
- 532 17. Du X, Yuan Q, Qu Y, Zhou Y, Bei J. Endometrial Mesenchymal Stem Cells Isolated from  
533 Menstrual Blood by Adherence. *Stem Cells Int*. 2016;2016:3573846.
- 534 18. Baldari S, Di Rocco G, Piccoli M, Pozzobon M, Muraca M, Toietta G. Challenges and  
535 Strategies for Improving the Regenerative Effects of Mesenchymal Stromal Cell-Based  
536 Therapies. *Int J Mol Sci*. 2017 Oct 2;18(10).
- 537 19. Noronha NC N de C, Mizukami A, Caliári-Oliveira C, Cominal JG, Rocha JLM, Covas DT, et  
538 al. Priming approaches to improve the efficacy of mesenchymal stromal cell-based therapies.  
539 *Stem Cell Res Ther* [Internet]. 2019 May 2 [cited 2020 Apr 2];10. Available from:  
540 <https://www.ncbi.nlm.nih.gov/pmc/articles/PMC6498654/>
- 541 20. Chinnadurai R, Copland IB, Garcia MA, Petersen CT, Lewis CN, Waller EK, et al.  
542 Cryopreserved Mesenchymal Stromal Cells Are Susceptible to T-Cell Mediated Apoptosis  
543 Which Is Partly Rescued by IFN $\gamma$  Licensing. *Stem Cells Dayt Ohio*. 2016;34(9):2429–42.
- 544 21. Croes M, Oner FC, Kruyt MC, Blokhuis TJ, Bastian O, Dhert WJA, et al. Proinflammatory  
545 Mediators Enhance the Osteogenesis of Human Mesenchymal Stem Cells after Lineage  
546 Commitment. *PloS One*. 2015;10(7):e0132781.
- 547 22. Carrero R, Cerrada I, Lledó E, Dopazo J, García-García F, Rubio M-P, et al. IL1 $\beta$  induces  
548 mesenchymal stem cells migration and leucocyte chemotaxis through NF- $\kappa$ B. *Stem Cell Rev*  
549 *Rep*. 2012 Sep;8(3):905–16.
- 550 23. Gorin C, Rochefort GY, Bascetin R, Ying H, Lesieur J, Sadoine J, et al. Priming Dental Pulp  
551 Stem Cells With Fibroblast Growth Factor-2 Increases Angiogenesis of Implanted Tissue-  
552 Engineered Constructs Through Hepatocyte Growth Factor and Vascular Endothelial Growth  
553 Factor Secretion. *Stem Cells Transl Med*. 2016 Mar;5(3):392–404.
- 554 24. Sivanathan KN, Rojas-Canales DM, Hope CM, Krishnan R, Carroll RP, Gronthos S, et al.  
555 Interleukin-17A-Induced Human Mesenchymal Stem Cells Are Superior Modulators of  
556 Immunological Function. *Stem Cells*. 2015 Sep;33(9):2850–63.
- 557 25. Oliveira-Bravo M, Sangiorgi BB, Schiavinato JLDS, Carvalho JL, Covas DT, Panepucci RA, et  
558 al. LL-37 boosts immunosuppressive function of placenta-derived mesenchymal stromal cells.  
559 *Stem Cell Res Ther*. 2016 30;7(1):189.

- 560 26. Liu J, Zhu P, Song P, Xiong W, Chen H, Peng W, et al. Pretreatment of Adipose Derived Stem  
561 Cells with Curcumin Facilitates Myocardial Recovery via Antiapoptosis and Angiogenesis.  
562 *Stem Cells Int.* 2015;2015:638153.
- 563 27. Kim YS, Kwon JS, Hong MH, Kang WS, Jeong H, Kang H, et al. Restoration of angiogenic  
564 capacity of diabetes-insulted mesenchymal stem cells by oxytocin. *BMC Cell Biol.* 2013 Sep  
565 11;14:38.
- 566 28. Shuai Y, Liao L, Su X, Yu Y, Shao B, Jing H, et al. Melatonin Treatment Improves  
567 Mesenchymal Stem Cells Therapy by Preserving Stemness during Long-term In Vitro  
568 Expansion. *Theranostics.* 2016;6(11):1899–917.
- 569 29. Xu R, Chen W, Zhang Z, Qiu Y, Wang Y, Zhang B, et al. Integrated data analysis identifies  
570 potential inducers and pathways during the endothelial differentiation of bone-marrow stromal  
571 cells by DNA methyltransferase inhibitor, 5-aza-2'-deoxycytidine. *Gene.* 2018 May 30;657:9–  
572 18.
- 573 30. Linares GR, Chiu C-T, Scheuing L, Leng Y, Liao H-M, Maric D, et al. Preconditioning  
574 mesenchymal stem cells with the mood stabilizers lithium and valproic acid enhances  
575 therapeutic efficacy in a mouse model of Huntington's disease. *Exp Neurol.* 2016;281:81–92.
- 576 31. Lim J, Lee S, Ju H, Kim Y, Heo J, Lee H-Y, et al. Valproic acid enforces the priming effect of  
577 sphingosine-1 phosphate on human mesenchymal stem cells. *Int J Mol Med.* 2017  
578 Sep;40(3):739–47.
- 579 32. Zhilai Z, Biling M, Sujun Q, Chao D, Benchao S, Shuai H, et al. Preconditioning in lowered  
580 oxygen enhances the therapeutic potential of human umbilical mesenchymal stem cells in a rat  
581 model of spinal cord injury. *Brain Res.* 2016 01;1642:426–35.
- 582 33. Beegle J, Lakatos K, Kalomoiris S, Stewart H, Isseroff RR, Nolte JA, et al. Hypoxic  
583 preconditioning of mesenchymal stromal cells induces metabolic changes, enhances survival,  
584 and promotes cell retention in vivo. *Stem Cells Dayt Ohio.* 2015 Jun;33(6):1818–28.
- 585 34. Lee JH, Yoon YM, Lee SH. Hypoxic Preconditioning Promotes the Bioactivities of  
586 Mesenchymal Stem Cells via the HIF-1 $\alpha$ -GRP78-Akt Axis. *Int J Mol Sci.* 2017 Jun 21;18(6).
- 587 35. Lan Y-W, Choo K-B, Chen C-M, Hung T-H, Chen Y-B, Hsieh C-H, et al. Hypoxia-  
588 preconditioned mesenchymal stem cells attenuate bleomycin-induced pulmonary fibrosis. *Stem  
589 Cell Res Ther.* 2015 May 20;6:97.
- 590 36. Showalter MR, Wancewicz B, Fiehn O, Archard JA, Clayton S, Wagner J, et al. Primed  
591 mesenchymal stem cells package exosomes with metabolites associated with  
592 immunomodulation. *Biochem Biophys Res Commun.* 2019 May 14;512(4):729–35.
- 593 37. Waterman RS, Tomchuck SL, Henkle SL, Betancourt AM. A new mesenchymal stem cell  
594 (MSC) paradigm: polarization into a pro-inflammatory MSC1 or an Immunosuppressive MSC2  
595 phenotype. *PloS One.* 2010 Apr 26;5(4):e10088.

- 596 38. Álvarez V, Sánchez-Margallo FM, Macías-García B, Gómez-Serrano M, Jorge I, Vázquez J, et  
597 al. The immunomodulatory activity of extracellular vesicles derived from endometrial  
598 mesenchymal stem cells on CD4+ T cells is partially mediated by TGFbeta. *J Tissue Eng Regen*  
599 *Med.* 2018 Oct;12(10):2088–98.
- 600 39. Marinaro F, Gómez-Serrano M, Jorge I, Silla-Castro JC, Vázquez J, Sánchez-Margallo FM, et  
601 al. Unraveling the Molecular Signature of Extracellular Vesicles From Endometrial-Derived  
602 Mesenchymal Stem Cells: Potential Modulatory Effects and Therapeutic Applications. *Front*  
603 *Bioeng Biotechnol.* 2019;7:431.
- 604 40. François M, Romieu-Mourez R, Li M, Galipeau J. Human MSC suppression correlates with  
605 cytokine induction of indoleamine 2,3-dioxygenase and bystander M2 macrophage  
606 differentiation. *Mol Ther J Am Soc Gene Ther.* 2012 Jan;20(1):187–95.
- 607 41. Rovira Gonzalez YI, Lynch PJ, Thompson EE, Stultz BG, Hursh DA. In vitro cytokine  
608 licensing induces persistent permissive chromatin at the Indoleamine 2,3-dioxygenase promoter.  
609 *Cytotherapy.* 2016;18(9):1114–28.
- 610 42. Tu Z, Li Q, Bu H, Lin F. Mesenchymal stem cells inhibit complement activation by secreting  
611 factor H. *Stem Cells Dev.* 2010 Nov;19(11):1803–9.
- 612 43. Varkouhi AK, Jerkic M, Ormesher L, Gagnon S, Goyal S, Rabani R, et al. Extracellular  
613 Vesicles from Interferon- $\gamma$ -primed Human Umbilical Cord Mesenchymal Stromal Cells Reduce  
614 *Escherichia coli*-induced Acute Lung Injury in Rats. *Anesthesiology.* 2019;130(5):778–90.
- 615 44. Gonçalves F da C, Luk F, Korevaar SS, Bouzid R, Paz AH, López-Iglesias C, et al. Membrane  
616 particles generated from mesenchymal stromal cells modulate immune responses by selective  
617 targeting of pro-inflammatory monocytes. *Sci Rep.* 2017 21;7(1):12100.
- 618 45. Liang Y-C, Wu Y-P, Li X-D, Chen S-H, Ye X-J, Xue X-Y, et al. TNF- $\alpha$ -induced exosomal  
619 miR-146a mediates mesenchymal stem cell-dependent suppression of urethral stricture. *J Cell*  
620 *Physiol.* 2019 Dec;234(12):23243–55.
- 621 46. Lu Z, Chen Y, Dunstan C, Roohani-Esfahani S, Zreiqat H. Priming Adipose Stem Cells with  
622 Tumor Necrosis Factor-Alpha Preconditioning Potentiates Their Exosome Efficacy for Bone  
623 Regeneration. *Tissue Eng Part A.* 2017;23(21–22):1212–20.
- 624 47. Mead B, Chamling X, Zack DJ, Ahmed Z, Tomarev S. TNF $\alpha$ -Mediated Priming of  
625 Mesenchymal Stem Cells Enhances Their Neuroprotective Effect on Retinal Ganglion Cells.  
626 *Invest Ophthalmol Vis Sci.* 2020 Feb 7;61(2):6–6.
- 627 48. Harting MT, Srivastava AK, Zhaorigetu S, Bair H, Prabhakara KS, Toledano Furman NE, et al.  
628 Inflammation-Stimulated Mesenchymal Stromal Cell-Derived Extracellular Vesicles Attenuate  
629 Inflammation. *Stem Cells Dayt Ohio.* 2018;36(1):79–90.

- 630 49. Domenis R, Cifù A, Quaglia S, Pistis C, Moretti M, Vicario A, et al. Pro inflammatory stimuli  
631 enhance the immunosuppressive functions of adipose mesenchymal stem cells-derived  
632 exosomes. *Sci Rep.* 2018 06;8(1):13325.
- 633 50. An J-H, Li Q, Bhang D-H, Song W-J, Youn H-Y. TNF- $\alpha$  and INF- $\gamma$  primed canine stem cell-  
634 derived extracellular vesicles alleviate experimental murine colitis. *Sci Rep.* 2020 Feb  
635 7;10(1):2115.
- 636 51. Marinaro F, Macías-García B, Sánchez-Margallo FM, Blázquez R, Álvarez V, Matilla E, et al.  
637 Extracellular vesicles derived from endometrial human mesenchymal stem cells enhance  
638 embryo yield and quality in an aged murine model. *Biol Reprod.* 2019 May 1;100(5):1180–92.
- 639 52. Shannon P, Markiel A, Ozier O, Baliga NS, Wang JT, Ramage D, et al. Cytoscape: A Software  
640 Environment for Integrated Models of Biomolecular Interaction Networks. *Genome Res.* 2003  
641 Nov;13(11):2498.
- 642 53. Pathan M, Keerthikumar S, Chisanga D, Alessandro R, Ang C-S, Askenase P, et al. A novel  
643 community driven software for functional enrichment analysis of extracellular vesicles data. *J*  
644 *Extracell Vesicles.* 2017;6(1):1321455.
- 645 54. Pathan M, Keerthikumar S, Ang C-S, Gangoda L, Quek CYJ, Williamson NA, et al. FunRich:  
646 An open access standalone functional enrichment and interaction network analysis tool.  
647 *PROTEOMICS.* 2015;15(15):2597–601.
- 648 55. Bernardo ME, Fibbe WE. Mesenchymal Stromal Cells: Sensors and Switchers of Inflammation.  
649 *Cell Stem Cell.* 2013 Oct 3;13(4):392–402.
- 650 56. Toyoda M, Cui C, Umezawa A. Myogenic transdifferentiation of menstrual blood-derived cells.  
651 *Acta Myol.* 2007 Dec;26(3):176–8.
- 652 57. Guerrouahen BS, Sidahmed H, Al Sulaiti A, Al Khulaifi M, Cugno C. Enhancing Mesenchymal  
653 Stromal Cell Immunomodulation for Treating Conditions Influenced by the Immune System.  
654 *Stem Cells Int [Internet].* 2019 Aug 5 [cited 2020 Jun 29];2019. Available from:  
655 <https://www.ncbi.nlm.nih.gov/pmc/articles/PMC6701346/>
- 656 58. Barkholt L, Flory E, Jekerle V, Lucas-Samuel S, Ahnert P, Bisset L, et al. Risk of  
657 tumorigenicity in mesenchymal stromal cell-based therapies--bridging scientific observations  
658 and regulatory viewpoints. *Cytotherapy.* 2013 Jul;15(7):753–9.
- 659 59. Guan Q, Li Y, Shpiruk T, Bhagwat S, Wall DA. Inducible indoleamine 2,3-dioxygenase 1 and  
660 programmed death ligand 1 expression as the potency marker for mesenchymal stromal cells.  
661 *Cytotherapy.* 2018;20(5):639–49.
- 662 60. DelaRosa O, Lombardo E, Beraza A, Mancheño-Corvo P, Ramirez C, Menta R, et al.  
663 Requirement of IFN-gamma-mediated indoleamine 2,3-dioxygenase expression in the  
664 modulation of lymphocyte proliferation by human adipose-derived stem cells. *Tissue Eng Part*  
665 *A.* 2009;15(10):2795–806.



- 666 61. Shi Y, Xia Y-Y, Wang L, Liu R, Khoo K-S, Feng Z-W. Neural cell adhesion molecule  
667 modulates mesenchymal stromal cell migration via activation of MAPK/ERK signaling. *Exp*  
668 *Cell Res*. 2012 Oct 15;318(17):2257–67.
- 669 62. Li X, Wang Q, Ding L, Wang Y-X, Zhao Z-D, Mao N, et al. Intercellular adhesion molecule-1  
670 enhances the therapeutic effects of MSCs in a dextran sulfate sodium-induced colitis models by  
671 promoting MSCs homing to murine colons and spleens. *Stem Cell Res Ther*. 2019  
672 23;10(1):267.
- 673 63. Tang B, Li X, Liu Y, Chen X, Li X, Chu Y, et al. The Therapeutic Effect of ICAM-1-  
674 Overexpressing Mesenchymal Stem Cells on Acute Graft-Versus-Host Disease. *Cell Physiol*  
675 *Biochem*. 2018;46(6):2624–35.
- 676 64. Nasef A, Chapel A, Mazurier C, Bouchet S, Lopez M, Mathieu N, et al. Identification of IL-10  
677 and TGF- $\beta$  Transcripts Involved in the Inhibition of T-Lymphocyte Proliferation During Cell  
678 Contact With Human Mesenchymal Stem Cells. *Gene Expr*. 2018 Jul 5;13(4–5):217–26.
- 679 65. Ridger VC, Wagner BE, Wallace WA, Hellewell PG. Differential effects of CD18, CD29, and  
680 CD49 integrin subunit inhibition on neutrophil migration in pulmonary inflammation. *J*  
681 *Immunol Baltim Md 1950*. 2001 Mar 1;166(5):3484–90.
- 682 66. Devine SM, Cobbs C, Jennings M, Bartholomew A, Hoffman R. Mesenchymal stem cells  
683 distribute to a wide range of tissues following systemic infusion into nonhuman primates.  
684 *Blood*. 2003 Apr 15;101(8):2999–3001.
- 685 67. Gaber T, Schönbeck K, Hoff H, Tran CL, Strehl C, Lang A, et al. CTLA-4 Mediates Inhibitory  
686 Function of Mesenchymal Stem/Stromal Cells. *Int J Mol Sci [Internet]*. 2018 Aug 7 [cited 2020  
687 Jul 1];19(8). Available from: <https://www.ncbi.nlm.nih.gov/pmc/articles/PMC6121442/>
- 688 68. Davies LC, Heldring N, Kadri N, Le Blanc K. Mesenchymal Stromal Cell Secretion of  
689 Programmed Death-1 Ligands Regulates T Cell Mediated Immunosuppression. *Stem Cells Dayt*  
690 *Ohio*. 2017;35(3):766–76.
- 691 69. Wu Y, Hoogduijn MJ, Baan CC, Korevaar SS, de Kuiper R, Yan L, et al. Adipose Tissue-  
692 Derived Mesenchymal Stem Cells Have a Heterogenic Cytokine Secretion Profile. *Stem Cells*  
693 *Int*. 2017;2017:4960831.
- 694 70. Xie Z, Tang S, Ye G, Wang P, Li J, Liu W, et al. Interleukin-6/interleukin-6 receptor complex  
695 promotes osteogenic differentiation of bone marrow-derived mesenchymal stem cells. *Stem Cell*  
696 *Res Ther [Internet]*. 2018 Jan 22 [cited 2020 Jul 3];9. Available from:  
697 <https://www.ncbi.nlm.nih.gov/pmc/articles/PMC5776773/>
- 698 71. Deng W, Chen H, Su H, Wu X, Xie Z, Wu Y, et al. IL6 Receptor Facilitates Adipogenesis  
699 Differentiation of Human Mesenchymal Stem Cells through Activating P38 Pathway. *Int J Stem*  
700 *Cells*. 2020 Mar 30;13(1):142–50.

- 701 72. Wong N, Wang X. miRDB: an online resource for microRNA target prediction and functional  
702 annotations. *Nucleic Acids Res.* 2015 Jan;43(Database issue):D146-152.
- 703 73. Liu W, Wang X. Prediction of functional microRNA targets by integrative modeling of  
704 microRNA binding and target expression data. *Genome Biol.* 2019 22;20(1):18.
- 705 74. Ragni E, Perucca Orfei C, De Luca P, Mondadori C, Viganò M, Colombini A, et al.  
706 Inflammatory priming enhances mesenchymal stromal cell secretome potential as a clinical  
707 product for regenerative medicine approaches through secreted factors and EV-miRNAs: the  
708 example of joint disease. *Stem Cell Res Ther.* 2020 Apr 28;11(1):165.
- 709 75. Xu C, Ren G, Cao G, Chen Q, Shou P, Zheng C, et al. miR-155 Regulates Immune Modulatory  
710 Properties of Mesenchymal Stem Cells by Targeting TAK1-binding Protein 2. *J Biol Chem.*  
711 2013 Apr 19;288(16):11074–9.
- 712 76. Zhang X, Hua F, Yang Z, Chen Y, Teng X, Huang H, et al. Enhancement of Immunoregulatory  
713 Function of Modified Bone Marrow Mesenchymal Stem Cells by Targeting SOCS1 [Internet].  
714 Vol. 2018, *BioMed Research International*. Hindawi; 2018 [cited 2020 Jul 10]. p. e3530647.  
715 Available from: <https://www.hindawi.com/journals/bmri/2018/3530647/>
- 716 77. Wang J, Huang R, Xu Q, Zheng G, Qiu G, Ge M, et al. Mesenchymal Stem Cell–Derived  
717 Extracellular Vesicles Alleviate Acute Lung Injury Via Transfer of miR-27a-3p\*. *Crit Care*  
718 *Med.* 2020 Jul;48(7):e599.
- 719 78. Wang J, Jia Z, Wei B, Zhou Y, Niu C, Bai S, et al. MicroRNA-27a restrains the immune  
720 response to mycobacterium tuberculosis infection by targeting IRAK4, a promoter of the NF-κB  
721 pathway. :8.
- 722 79. Chi Y, Cui J, Wang Y, Du W, Chen F, Li Z, et al. Interferon-γ alters the microRNA profile of  
723 umbilical cord-derived mesenchymal stem cells. *Mol Med Rep.* 2016 Nov;14(5):4187–97.
- 724 80. Wang L, Yin P, Wang J, Wang Y, Sun Z, Zhou Y, et al. Delivery of mesenchymal stem cells-  
725 derived extracellular vesicles with enriched miR-185 inhibits progression of OPMD. *Artif Cells*  
726 *Nanomedicine Biotechnol.* 2019 Dec 4;47(1):2481–91.
- 727 81. Lange-Consiglio A, Romele P, Magatti M, Silini A, Idda A, Martino NA, et al. Priming with  
728 inflammatory cytokines is not a prerequisite to increase immune-suppressive effects and  
729 responsiveness of equine amniotic mesenchymal stromal cells. *Stem Cell Res Ther.* 2020 Mar  
730 4;11(1):99.

731

## 732 1. Figure legends

733 **Figure 1. Graphic overview of key experimental procedures.** (A) IFN $\gamma$ , TNF $\alpha$ , LPS, and Poly  
734 (I:C) were used at different concentrations, single or in combination, to prime *in vitro* cultured  
735 endMSCs. The optimal priming strategy was identified by ELISA in terms of IDO1 release. (B) In

736 accordance with ELISA results, endMSCs were primed with 100 ng/ml IFN $\gamma$ /TNF $\alpha$ , and the  
737 phenotypic profile of primed and control endMSCs was determined by flow cytometry. EndMSC and  
738 endMSC\* collected medium were concentrate to get secretomes. The molecular profile of secretomes  
739 was analyzed by Next Generation Sequencing (NGS). In addition, the immunomodulatory activity of  
740 control S-endMSCs or S-endMSCs\* was analyzed in a lymphocyte activation assay. Images have  
741 been created with BioRender (<https://app.biorender.com/>).

742 **Figure 2. Release of soluble IDO1 by primed endMSCs.** endMSCs (n = 3) were primed with  
743 several combinations and concentrations of proinflammatory cytokines: IFN $\gamma$  and TNF $\alpha$ , and TLR  
744 ligands: LPS and Poly (I:C). Levels of released IDO1 by the cells were tested by ELISA. A paired *t*-  
745 test was used to compare IDO1 levels in control endMSCs with the different priming conditions.  
746 Error bars represent the standard deviations of data. Asterisks indicate statistically significant  
747 differences: \**p* < .05, \*\**p* < .01, \*\*\* *p* < .001.

748 **Figure 3. Phenotypic surface marker expression on endMSCs.** Analysis of surface markers in  
749 control endMSCs (n = 3) and endMSCs\* (n = 3) using 100 ng/ml IFN $\gamma$  and 100 ng/ml TNF $\alpha$  at 3  
750 days. (A) The expression level of 40 cell surface markers (Stain Index (SI) value) were illustrated in  
751 a heat map. To compare control endMSCs and endMSCs\*, a paired *t*-test was carried out and *p* < .05  
752 were considered statistically significant. The color scale for the SI values gives the highest  
753 expression values (red) and the lowest (blue); the orange color scale indicates the grade of  
754 signification, being the most significant ones in dark orange. (B) Representative histograms of  
755 statistically different markers are shown. The expression in endMSCs is represented by a black lined  
756 histogram and in endMSCs\* by a discontinuous line. The opaque gray histogram corresponds to the  
757 fluorescence negative control. (C) Reactome and Gene Ontology enrichment analyses of statistically  
758 significant different markers were performed by adjusting *p* value by Benjamini-Hochberg FDR  
759 correction < .01. Graph bars represent the number of surface markers included into each category of  
760 Reactome (orange) and Gene Ontology (blue).

761 **Figure 4. Effects of IFN $\gamma$ /TNF $\alpha$  priming on S-endMSCs microRNAome.** A selection of the 25  
762 miRNAs which showed a significant increase in S-endMSC\*, were used for further analyses. (A)  
763 Principal Component Analysis (PCA) plots. Score plot for PC1 (57.1% variance explained) vs. PC2  
764 (26.8% variance explained). (B) Hierarchical Clustering of secretomes (S-endMSC1, S-endMSC2, S-  
765 endMSC3) and the different conditions (basal red and primed in blue) together with the heat map  
766 corresponding to the selected miRNA expressions. (C) Enrichment analysis revealed a significant  
767 implication of the selected miRNAs in Gene Ontology categories (*p* value adjusted by Benjamini-  
768 Hochberg FDR correction < .01). Graph bars represent the number of miRNAs in each category.

769 **Figure 5. Predicted target genes for miRNAs.** Target genes of significantly increased miRNAs  
770 from S-endMSC\*. Target genes classified into the category *Inflammatory Response category*  
771 (GO:0006954) were sub-classified into four sub-categories (*Innate Immune Response* (orange),  
772 *Adaptive Immune Response* (blue), *Positive Regulation of Inflammatory Response* (green), and  
773 *Negative Regulation of Inflammatory Response* (red). Interaction network of gene targets (dark blue  
774 ellipses) and miRNAs (brown rectangles) were illustrated using Cytoscape Software.

775 **Figure 6. Lymphocyte activation assays for the evaluation of Secretomes.** PBLs from a healthy  
776 donor were stimulated and simultaneously co-cultured with S-endMSCs (n = 3) and S-endMSCs\* (n  
777 = 3) at 40 µg/ml for 6 days. (A) Percentage of CD4+ and (B) percentage of CD8+ effector memory T  
778 cells (CD45RA-/CD62L-). Data from non-stimulated PBLs is not shown. Values represent the mean  
779 ± SD of independently performed experiments. Data were statistically analyzed using a paired *t*-test  
780 and *p* value was considered significant at < .05. \*Statistically significant differences (*p* < .05).  
781 \*\*Statistically significant comparison (*p* < .005). A representative dot plot of each condition is  
782 illustrated: (C) CD4+ and (D) CD8+ T cells. The gates for CD45RA and CD62L were drawn  
783 according to negative controls.

784 **Supplementary table 1. Panel of human monoclonal antibodies used for the phenotypic**  
785 **characterization of endMSCs and IFN $\gamma$ /TNF $\alpha$ -primed endMSCs by flow cytometry.** The table  
786 includes relevant information of these markers.

787 **Supplementary table 2. The most abundant miRNAs in secretomes (S-endMSCs and S-**  
788 **endMSC\*).**

789 **Supplementary table 3. The top ten of miRNAs with the highest fold change in secretome**  
790 **samples.**



**(A)****COMBINATIONS****1 ng/ml  
LPS****1 ng/ml  
Poly (I:C)****1 ng/ml  
TNF $\alpha$** **1 ng/ml  
IFN $\gamma$** **100 ng/ml  
TNF $\alpha$** **100 ng/ml  
IFN $\gamma$** 

bioRxiv preprint doi: <https://doi.org/10.1101/2021.06.10.447490>; this version posted June 10, 2021. The copyright holder for this preprint (which was not certified by peer review) is the author/funder. All rights reserved. No reuse allowed without permission.

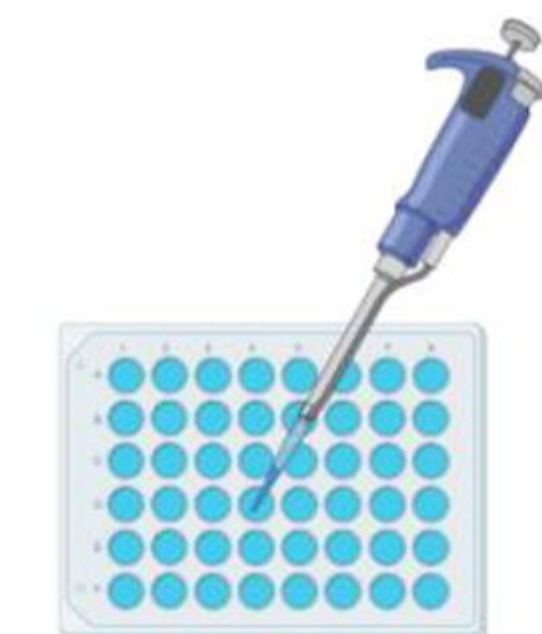Primed-  
endMSCs**72 h**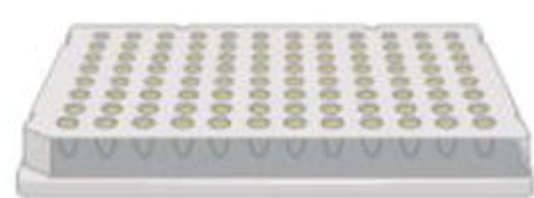Soluble IDO1  
ELISA**(B)**Control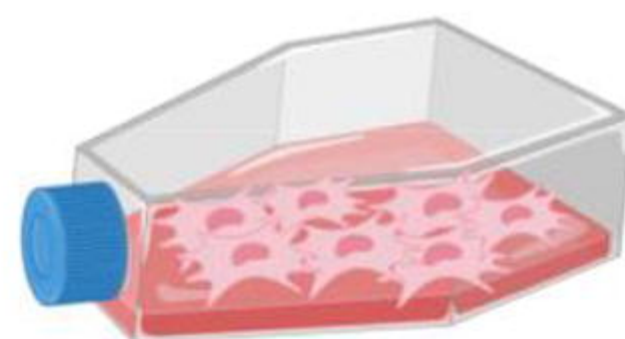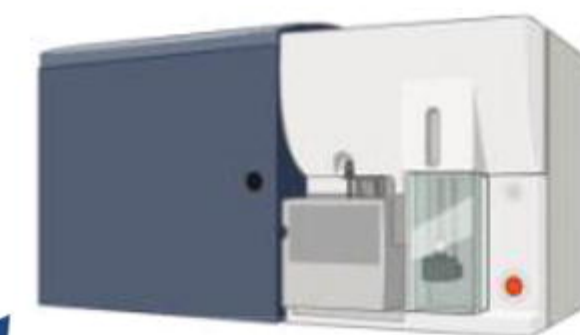

Flow Cytometry

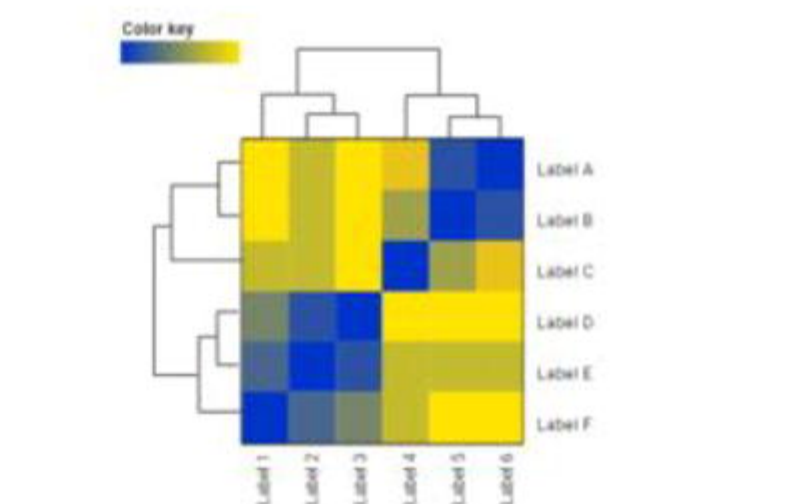Phenotypic Surface  
Marker Expression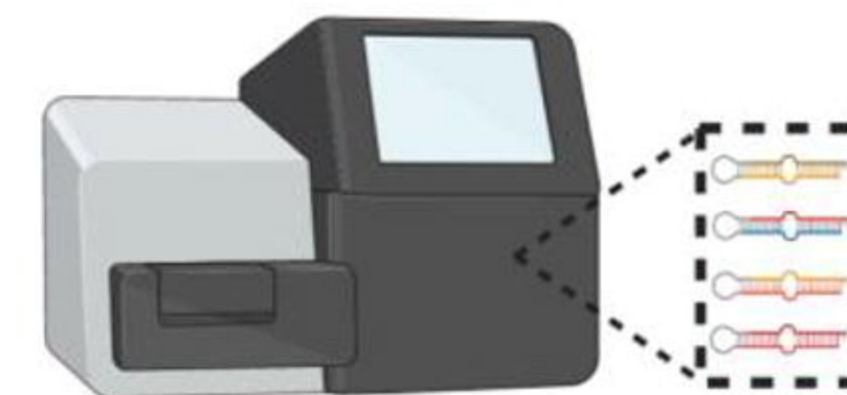miRNA Analysis  
by NGS**72 h****72 h**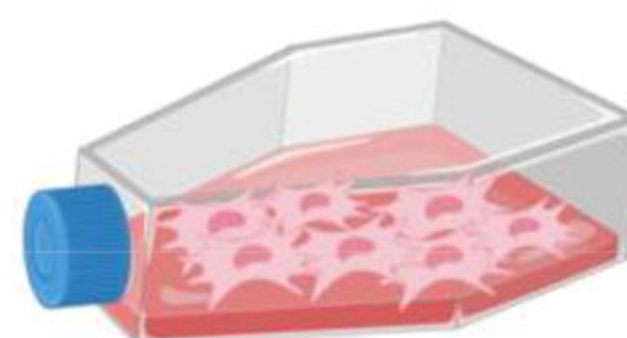IFN $\gamma$  / TNF $\alpha$ 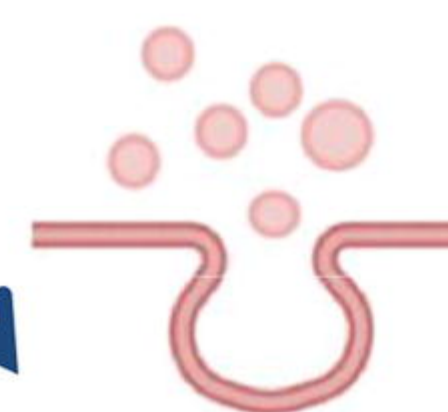EVendMSC  
Purification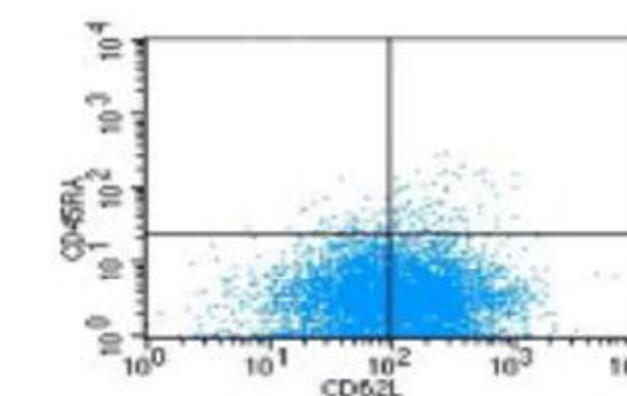Immunomodulatory  
Activity AssaySelected  
priming



Released soluble IDO1  
(ng/ml)

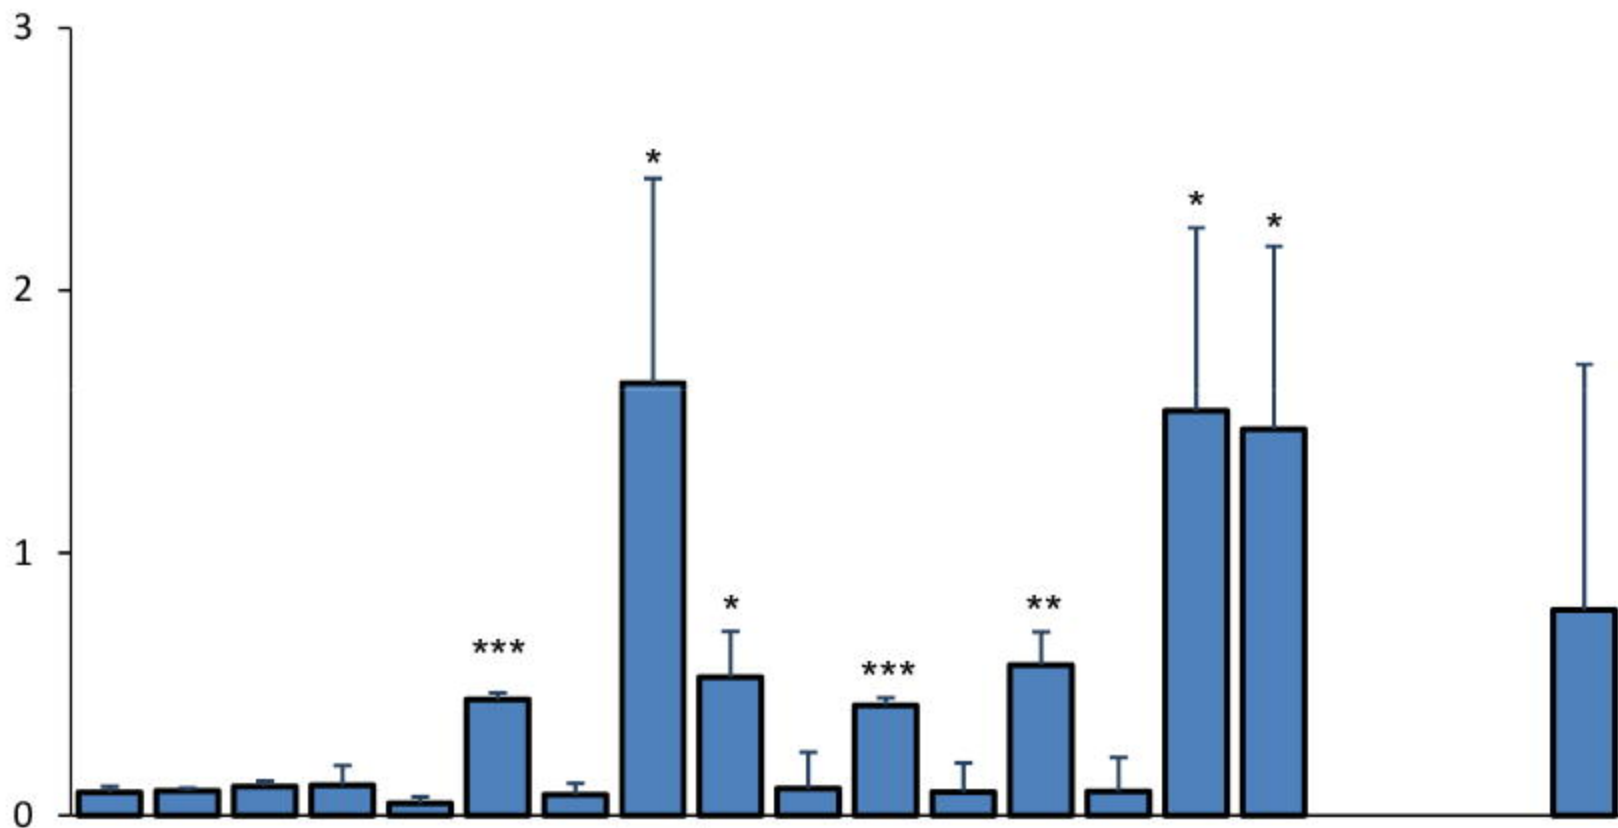

|                          |   |   |   |   |   |   |   |   |   |   |   |   |   |   |   |   |   |   |   |   |
|--------------------------|---|---|---|---|---|---|---|---|---|---|---|---|---|---|---|---|---|---|---|---|
| LPS (1 ng/ml)            | - | - | - | + | - | - | - | - | + | + | - | - | + | + | + | - | + | - | - | + |
| Poly (I:C) (1 ng/ml)     | - | - | - | - | + | - | - | - | - | - | + | + | + | + | - | + | + | + | - | + |
| IFN $\gamma$ (1 ng/ml)   | - | + | - | - | - | - | - | - | - | - | - | - | - | - | - | - | - | - | + | - |
| IFN $\gamma$ (100 ng/ml) | - | - | - | - | - | + | - | + | + | - | + | - | + | - | + | + | - | - | - | + |
| TNF $\alpha$ (1 ng/ml)   | - | - | + | - | - | - | - | - | - | - | - | - | - | - | - | - | - | + | + | - |
| TNF $\alpha$ (100 ng/ml) | - | - | - | - | - | - | + | + | - | + | - | + | - | + | + | + | - | - | - | + |



**(A)**

| Antigen | endMSCs |         |         | endMSCs* |          |          | p value |
|---------|---------|---------|---------|----------|----------|----------|---------|
|         | endMSC1 | endMSC2 | endMSC3 | endMSCs1 | endMSCs2 | endMSCs3 |         |
| CD44    | 298.30  | 19.49   | 15.64   | 373.84   | 101.87   | 417.41   | 0.225   |
| CD73    | 86.08   | 14.99   | 8.72    | 377.66   | 109.72   | 237.43   | 0.072   |
| CD29    | 32.22   | 15.59   | 44.67   | 16.00    | 8.67     | 40.11    | 0.122   |
| CD49e   | 45.78   | 2.88    | 2.77    | 113.34   | 76.92    | 65.59    | 0.002   |
| CD9     | 9.97    | 5.09    | 23.07   | 4.58     | 2.42     | 4.42     | 0.213   |
| CD59    | 14.27   | 15.73   | 1.32    | 4.84     | 9.96     | 25.41    | 0.806   |
| CD49b   | 11.97   | 6.55    | 9.49    | 12.72    | 7.86     | 13.01    | 0.159   |
| CD55    | 21.39   | 2.40    | 1.47    | 72.01    | 16.99    | 33.63    | 0.089   |
| CD49c   | 10.21   | 5.29    | 8.50    | 9.54     | 3.65     | 7.30     | 0.054   |
| CD49f   | 4.89    | 10.58   | 5.06    | 2.21     | 3.84     | 1.46     | 0.072   |
| CD105   | 14.40   | 1.20    | 0.69    | 29.49    | 20.37    | 33.63    | 0.053   |
| CD49a   | 10.28   | 2.02    | 1.69    | 58.31    | 20.25    | 71.87    | 0.094   |
| CD166   | 1.19    | 3.74    | 8.83    | 3.39     | 10.77    | 0.45     | 0.957   |
| CD90    | 11.52   | 0.23    | 0.88    | 28.46    | 5.28     | 19.21    | 0.086   |
| CD61    | 5.75    | 1.20    | 5.40    | 2.77     | 1.09     | 14.34    | 0.641   |
| CD51    | 5.86    | 0.82    | 5.42    | 22.54    | 5.17     | 18.74    | 0.090   |
| CD107a  | 9.47    | 0.98    | 0.99    | 35.54    | 93.41    | 31.60    | 0.146   |
| CD71    | 6.69    | 0.61    | 2.95    | 0.85     | 2.49     | 1.88     | 0.553   |
| CD49d   | 2.75    | 3.57    | 2.26    | 0.90     | 1.21     | 1.19     | 0.042   |
| CD58    | 7.22    | 0.43    | 0.52    | 25.15    | 13.45    | 20.93    | 0.016   |
| HLAI    | 5.06    | 0.61    | 1.60    | 58.76    | 22.05    | 50.32    | 0.054   |
| CD54    | 3.21    | 1.75    | 2.18    | 261.73   | 217.63   | 133.17   | 0.033   |
| CD16    | 4.21    | 1.13    | 1.66    | 1.79     | 2.44     | 1.44     | 0.723   |
| CD274   | 5.68    | 0.37    | 0.62    | 44.43    | 40.97    | 41.27    | <0.001  |
| CD273   | 5.89    | 0.15    | 0.22    | 10.96    | 5.50     | 12.09    | 0.079   |
| CD38    | 3.19    | 0.14    | 2.00    | 5.21     | 37.24    | 5.67     | 0.338   |
| CD66    | 3.73    | 0.10    | 0.32    | 10.34    | 2.52     | 14.55    | 0.154   |
| CD279   | 1.03    | 1.90    | 0.66    | 1.25     | 0.28     | 2.17     | 0.972   |
| CD282   | 3.26    | 0.18    | 0.10    | 5.06     | 11.56    | 6.03     | 0.149   |
| CD152   | 2.86    | 0.21    | 0.11    | 7.52     | 4.24     | 3.63     | 0.007   |
| CD56    | 2.21    | 0.44    | 0.18    | 3.40     | 2.70     | 1.67     | 0.035   |
| CD120b  | 2.54    | 0.12    | 0.13    | 4.22     | 4.47     | 2.10     | 0.087   |
| CD20    | 0.68    | 0.07    | 1.82    | 1.28     | 0.37     | 0.92     | 0.999   |
| CD48    | 2.16    | 0.09    | 0.09    | 3.66     | 3.84     | 1.75     | 0.086   |
| CD126   | 1.55    | 0.08    | 0.07    | 2.67     | 1.92     | 1.67     | 0.019   |
| CD62E   | 1.35    | 0.10    | 0.12    | 9.32     | 2.87     | 2.42     | 0.139   |
| CD50    | 0.75    | 0.12    | 0.06    | 4.28     | 1.58     | 1.52     | 0.089   |
| CD133   | 0.73    | 0.14    | 0.03    | 8.18     | 0.83     | 3.11     | 0.199   |
| CD63    | 0.09    | 0.26    | 0.05    | 18.12    | 14.21    | 18.71    | 0.008   |
| HLAII   | 0.24    | 0.00    | 0.01    | 4.07     | 1.76     | 2.09     | 0.058   |

**(B)**

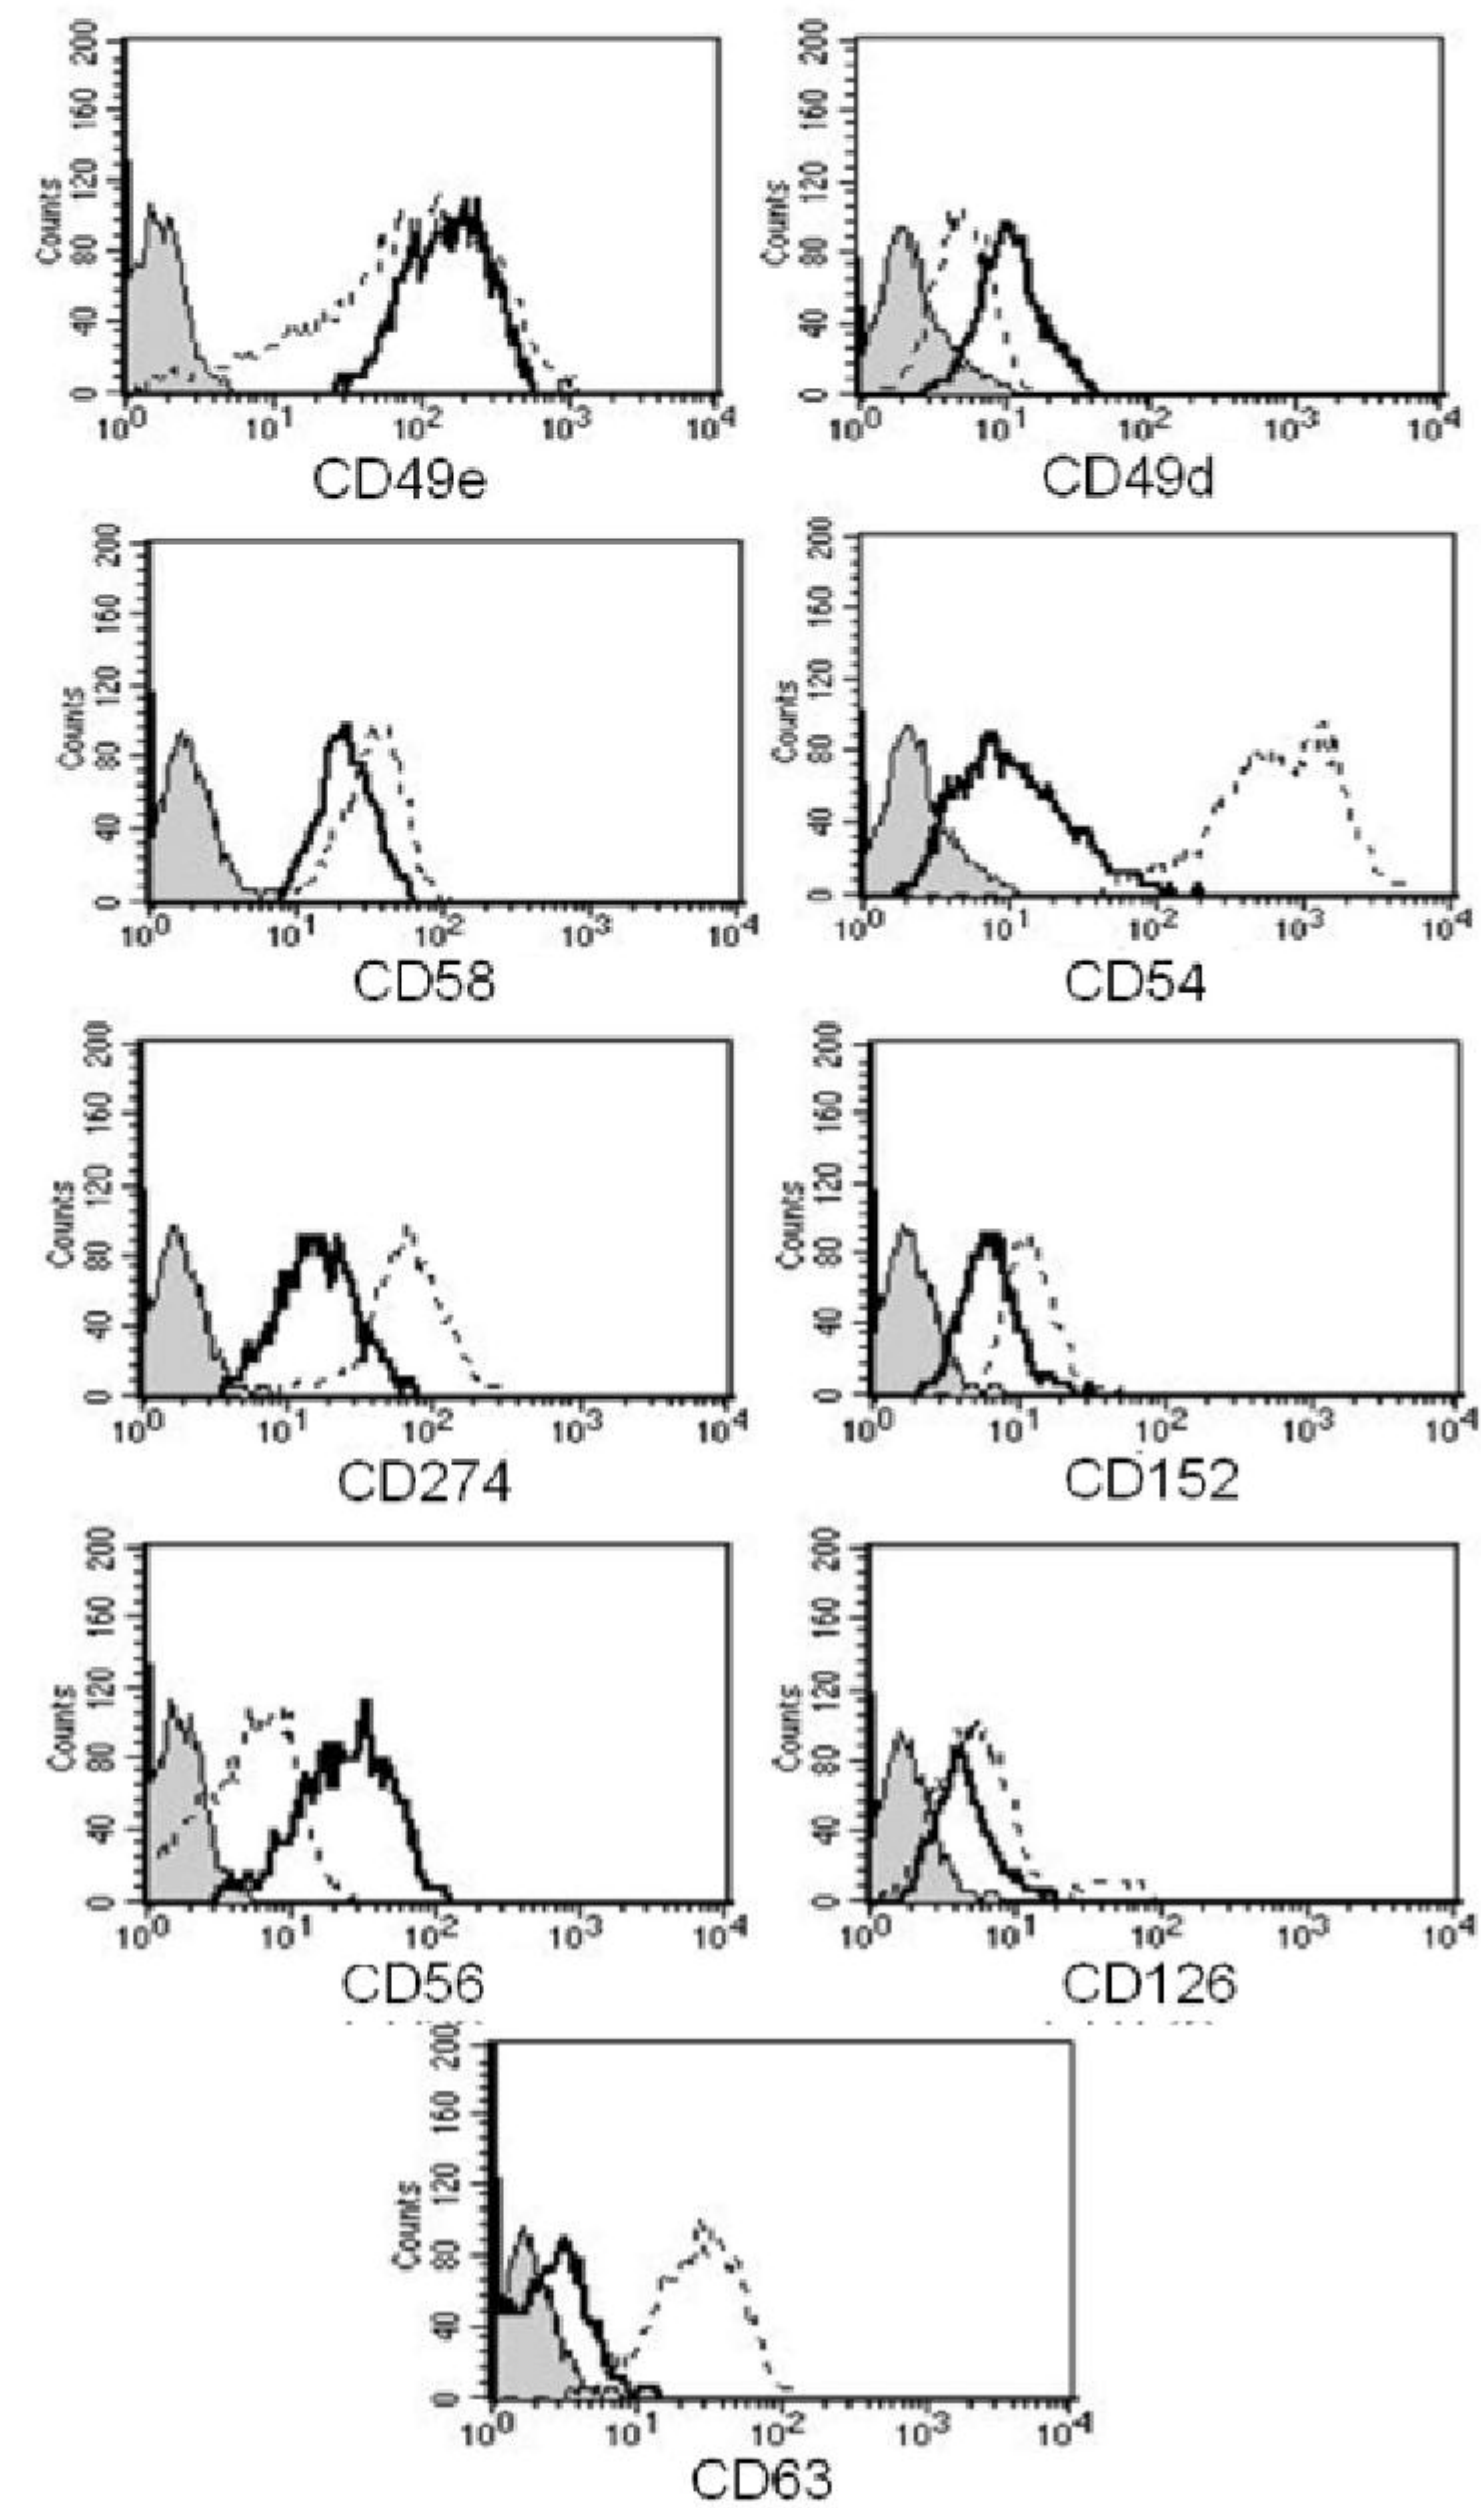

bioRxiv preprint doi: <https://doi.org/10.1101/2021.06.10.447490>; this version posted June 10, 2021. The copyright holder for this preprint (which was not certified by peer review) is the author/funder. All rights reserved. No reuse allowed without permission.

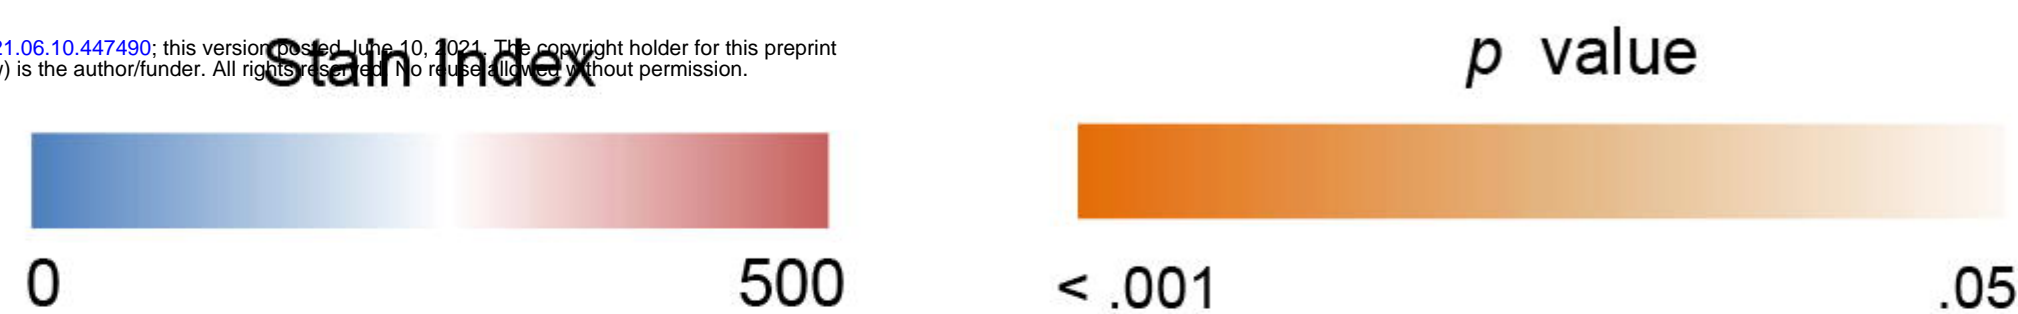

**(C)**

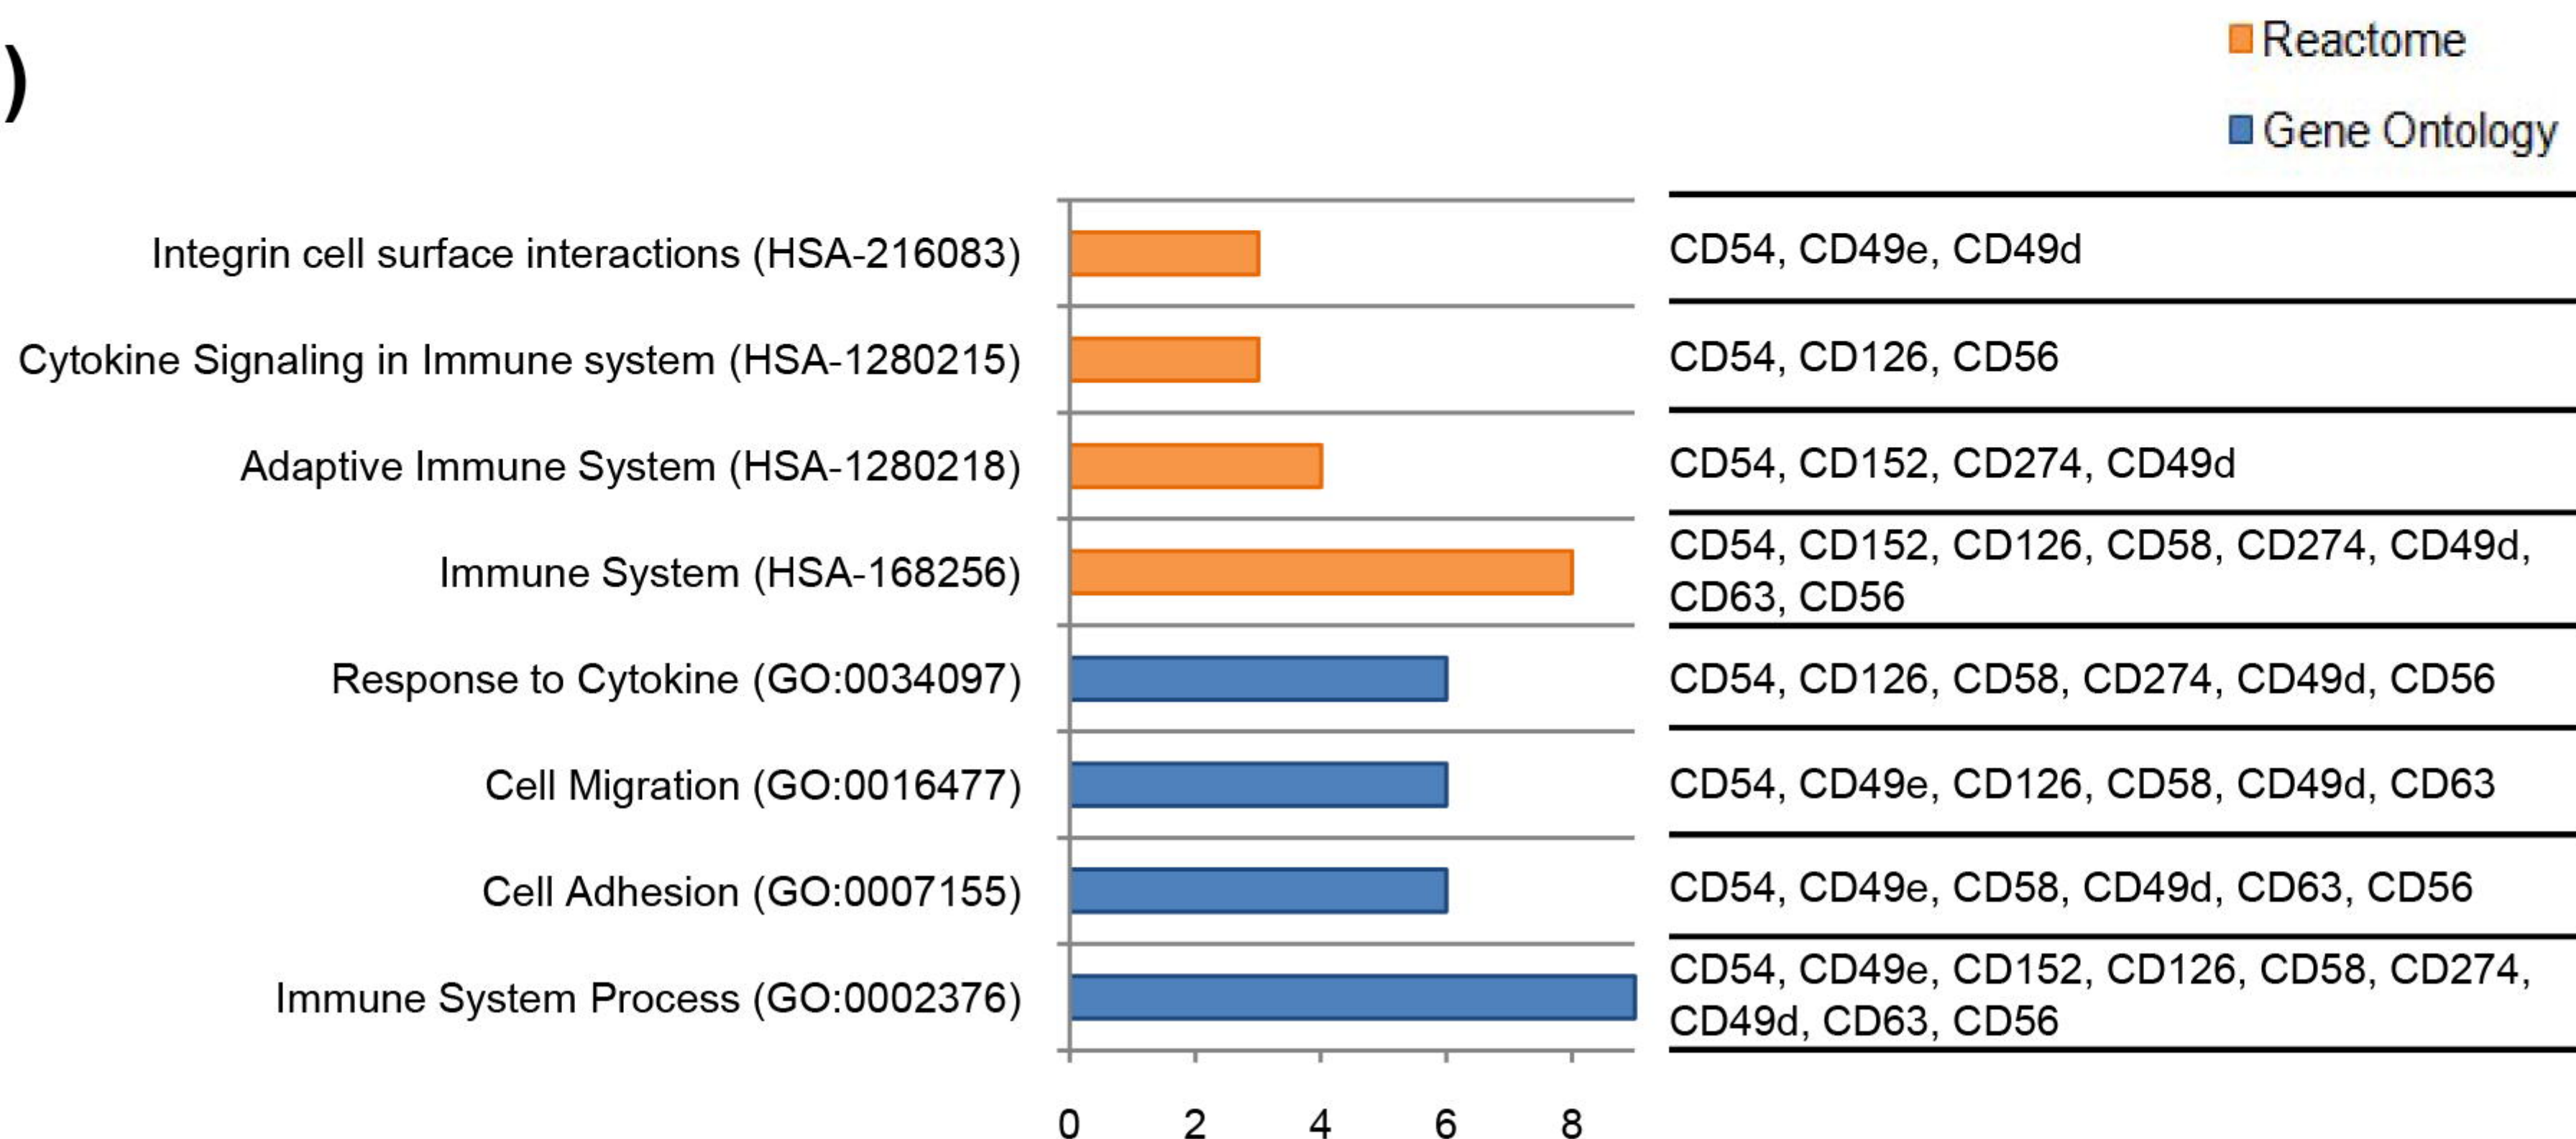



**(A)**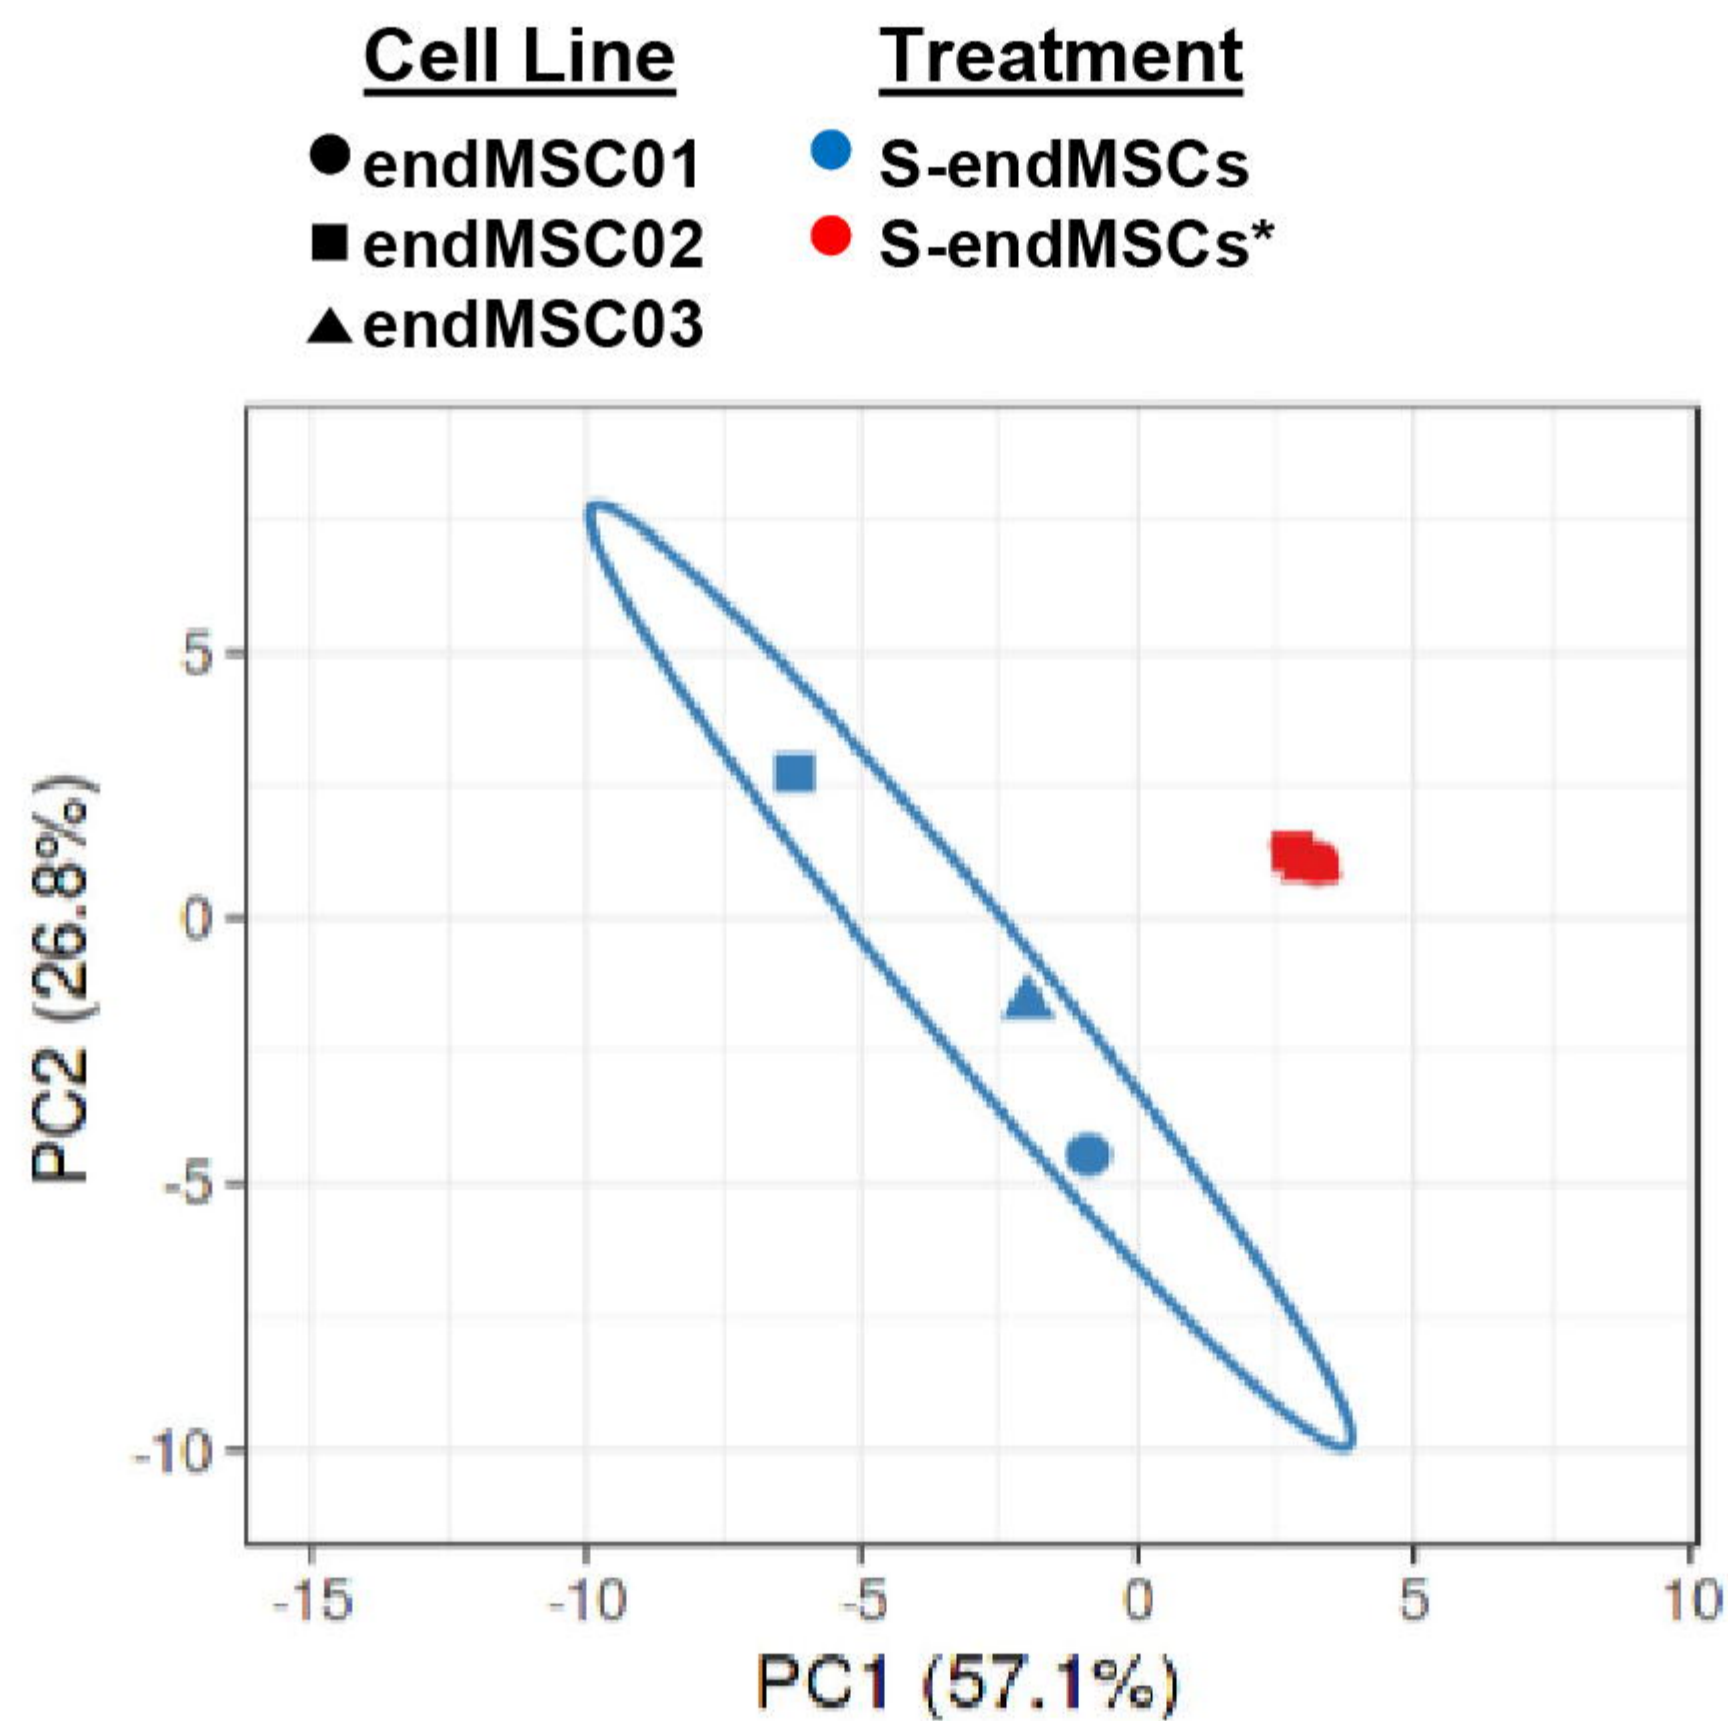**(B)**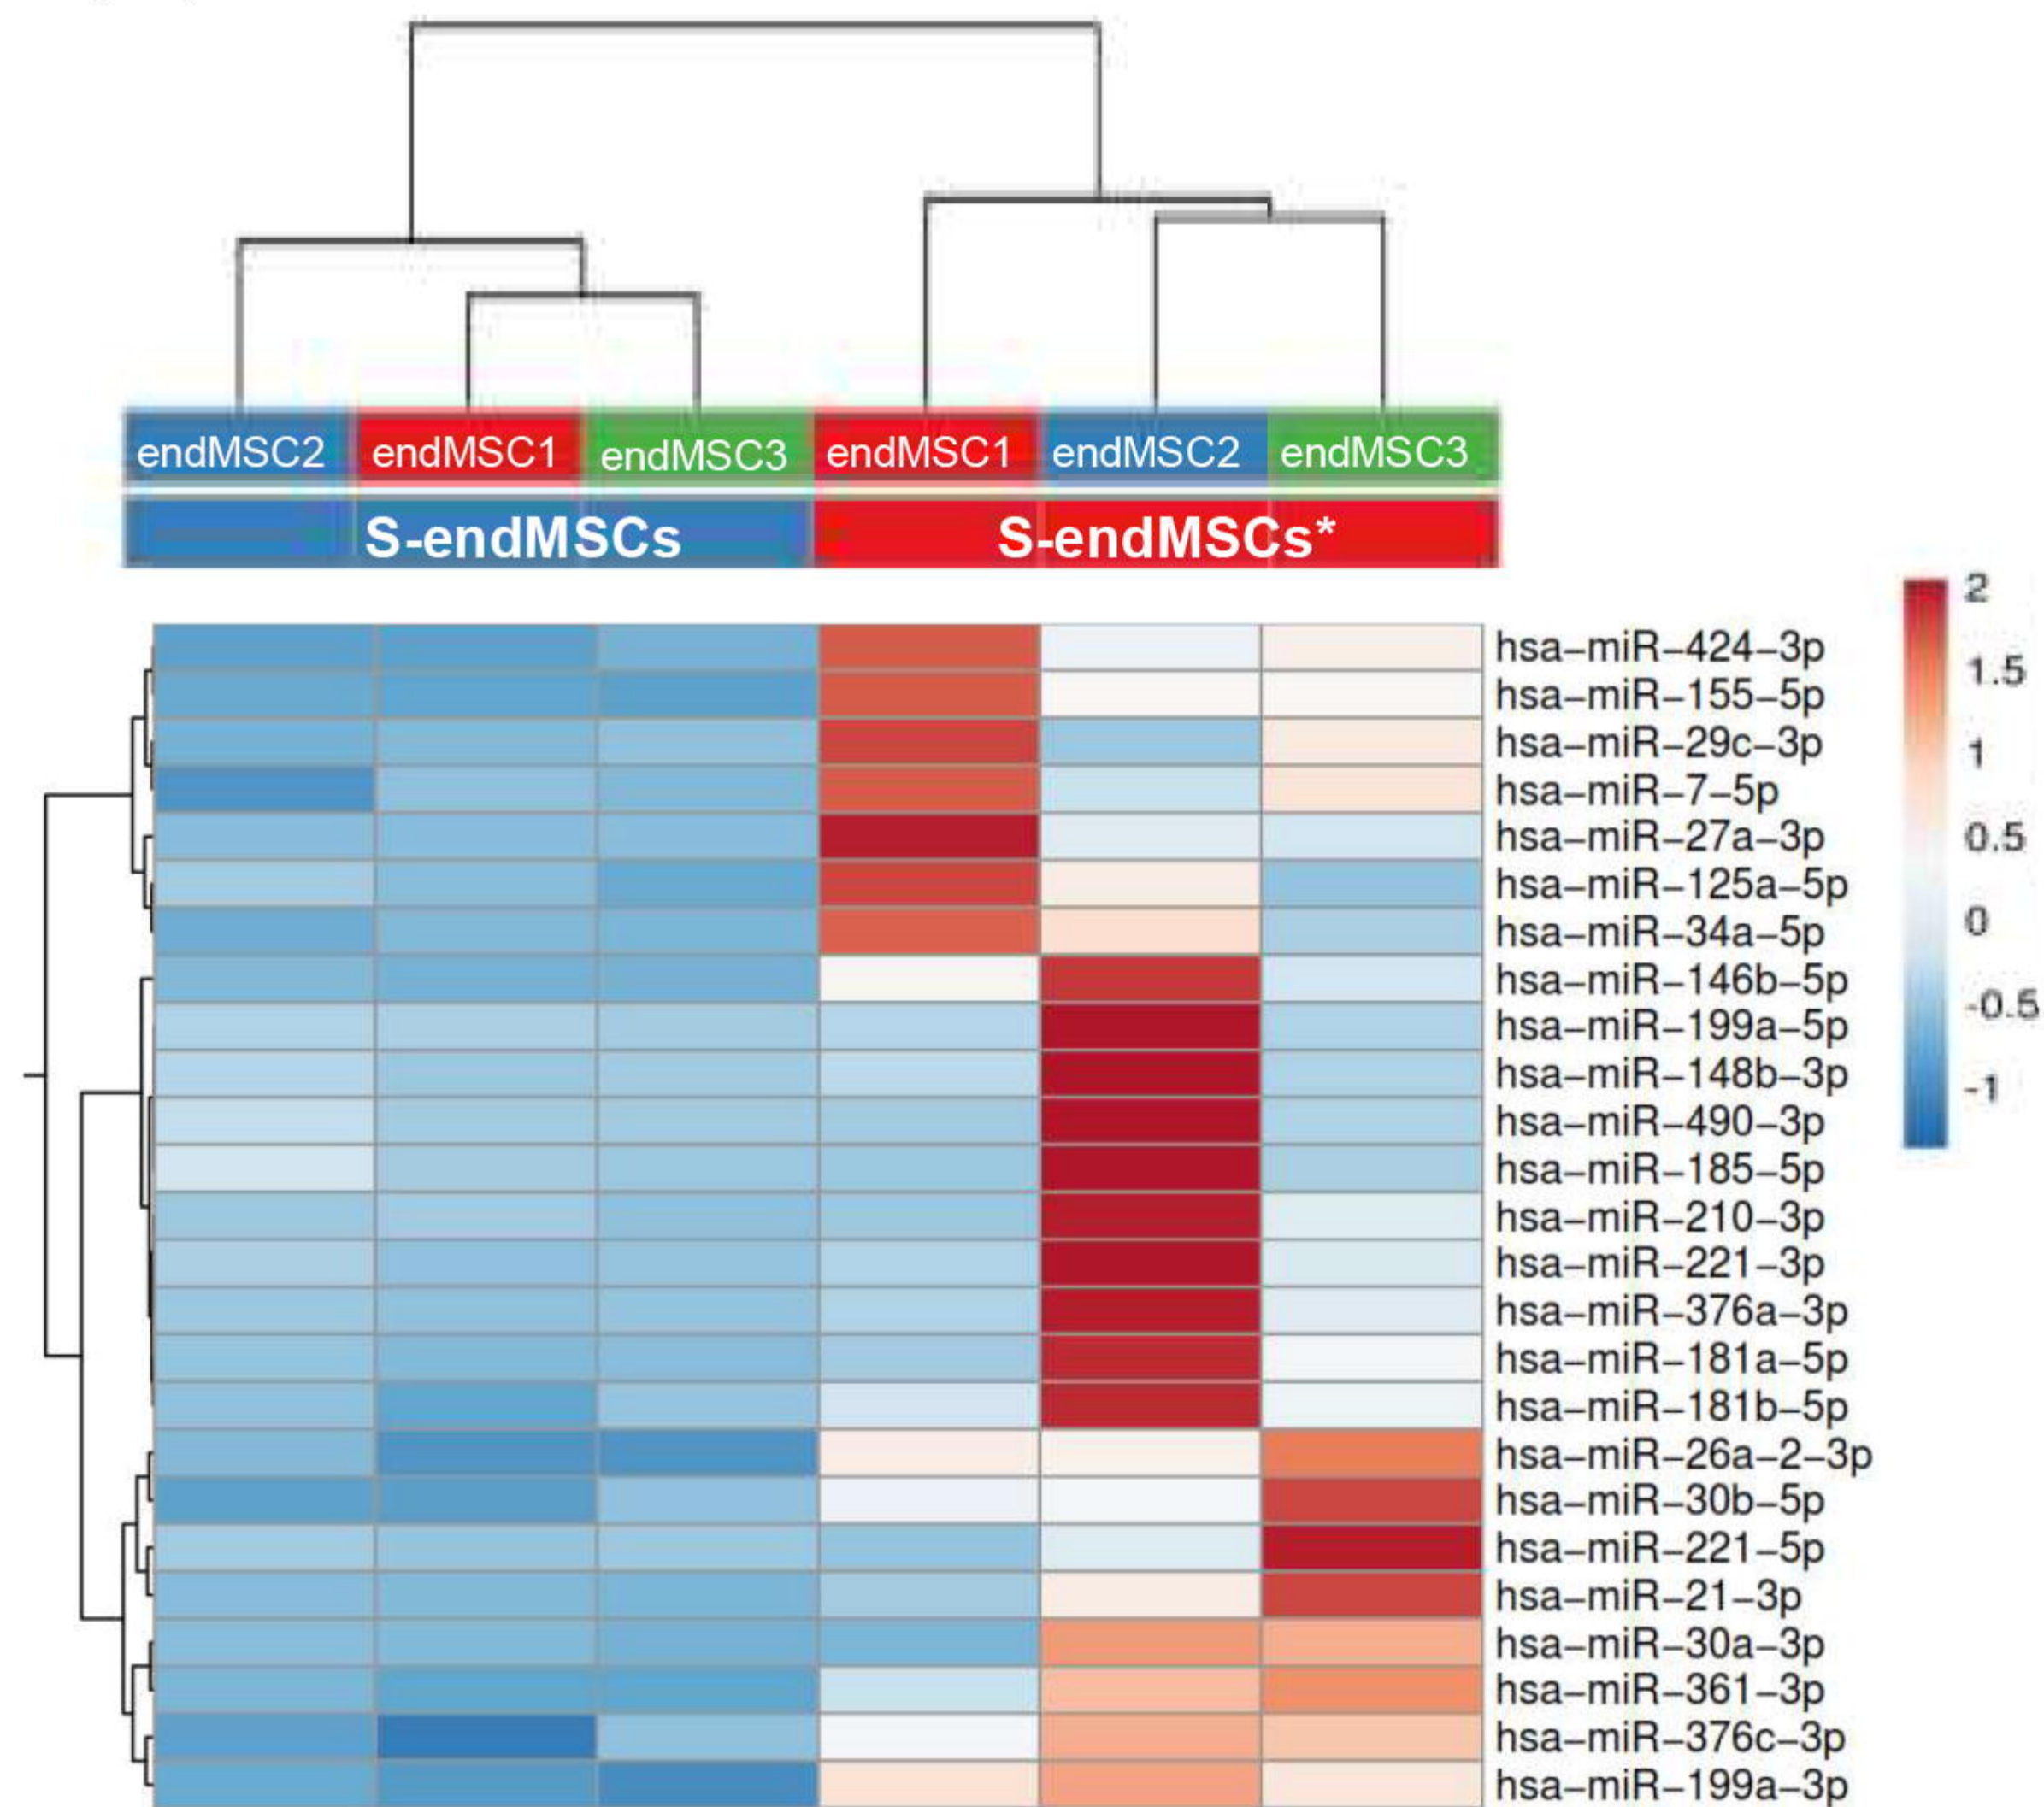**(C)**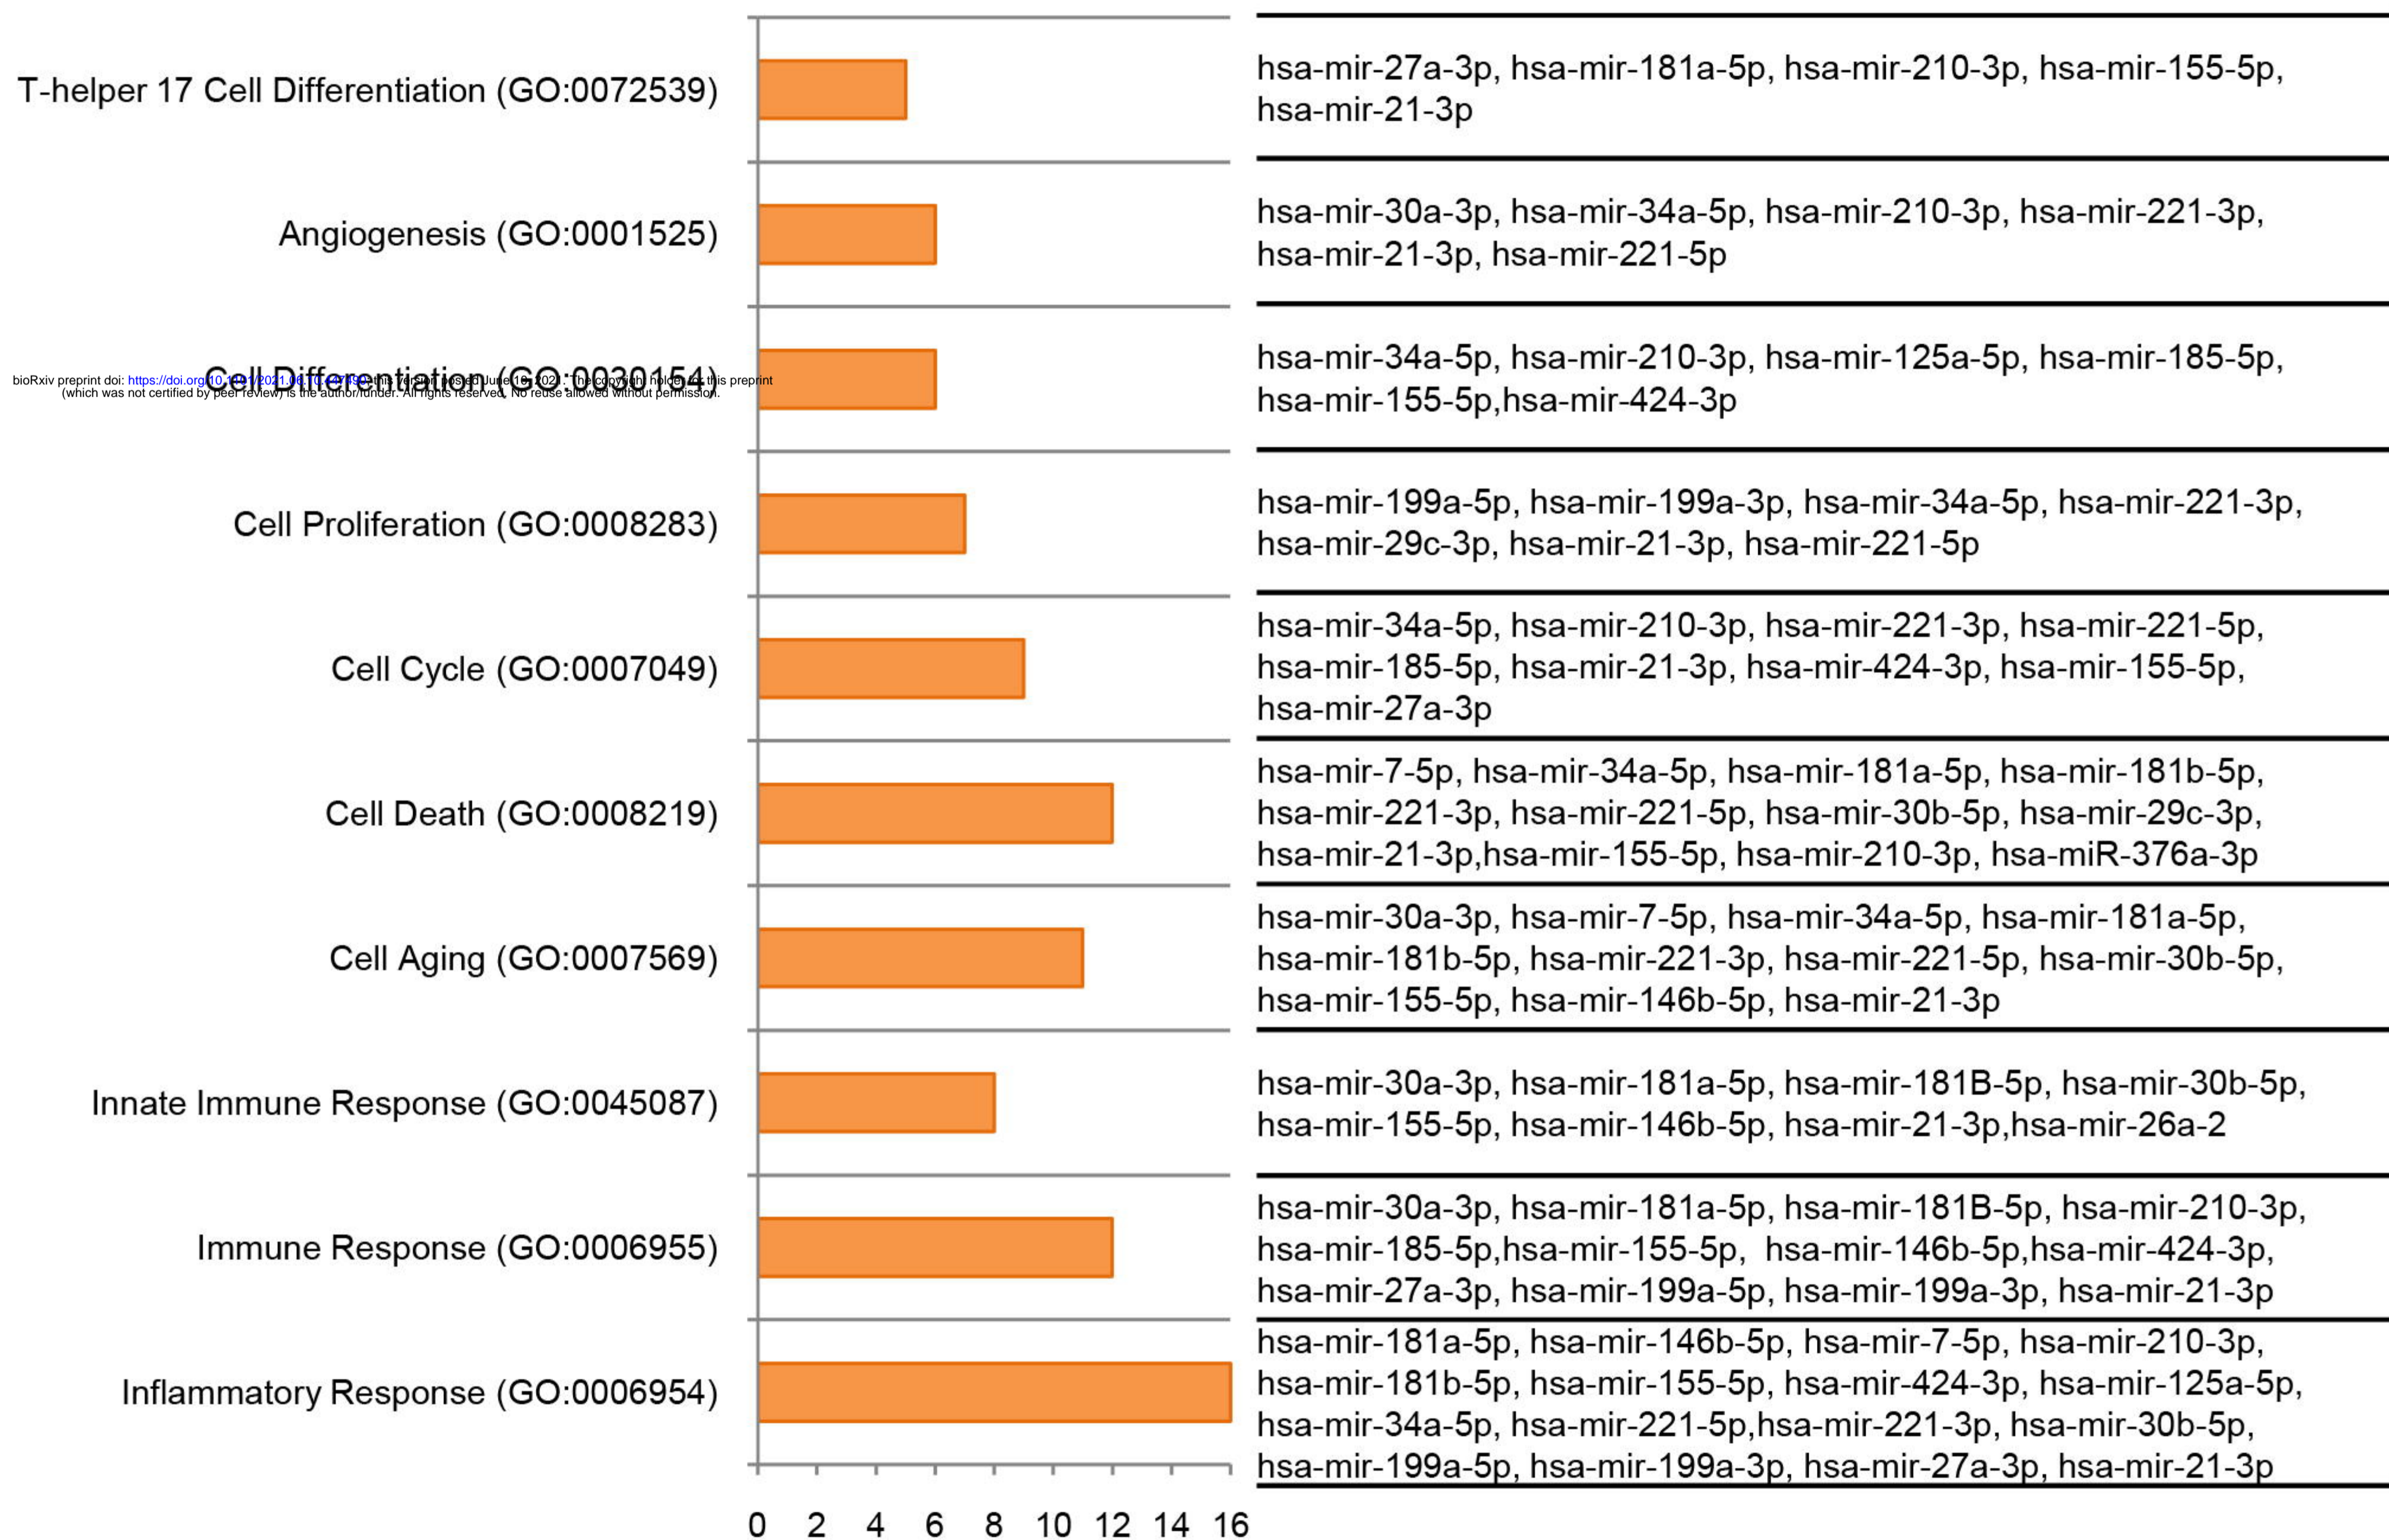



Positive Regulation of Inflammatory Response  
(GO:0050729)

Negative Regulation of Inflammatory Response  
(GO:0050728)

Adaptive Immune Response  
(GO:0002250)

Innate Immune Response  
(GO:0045087)

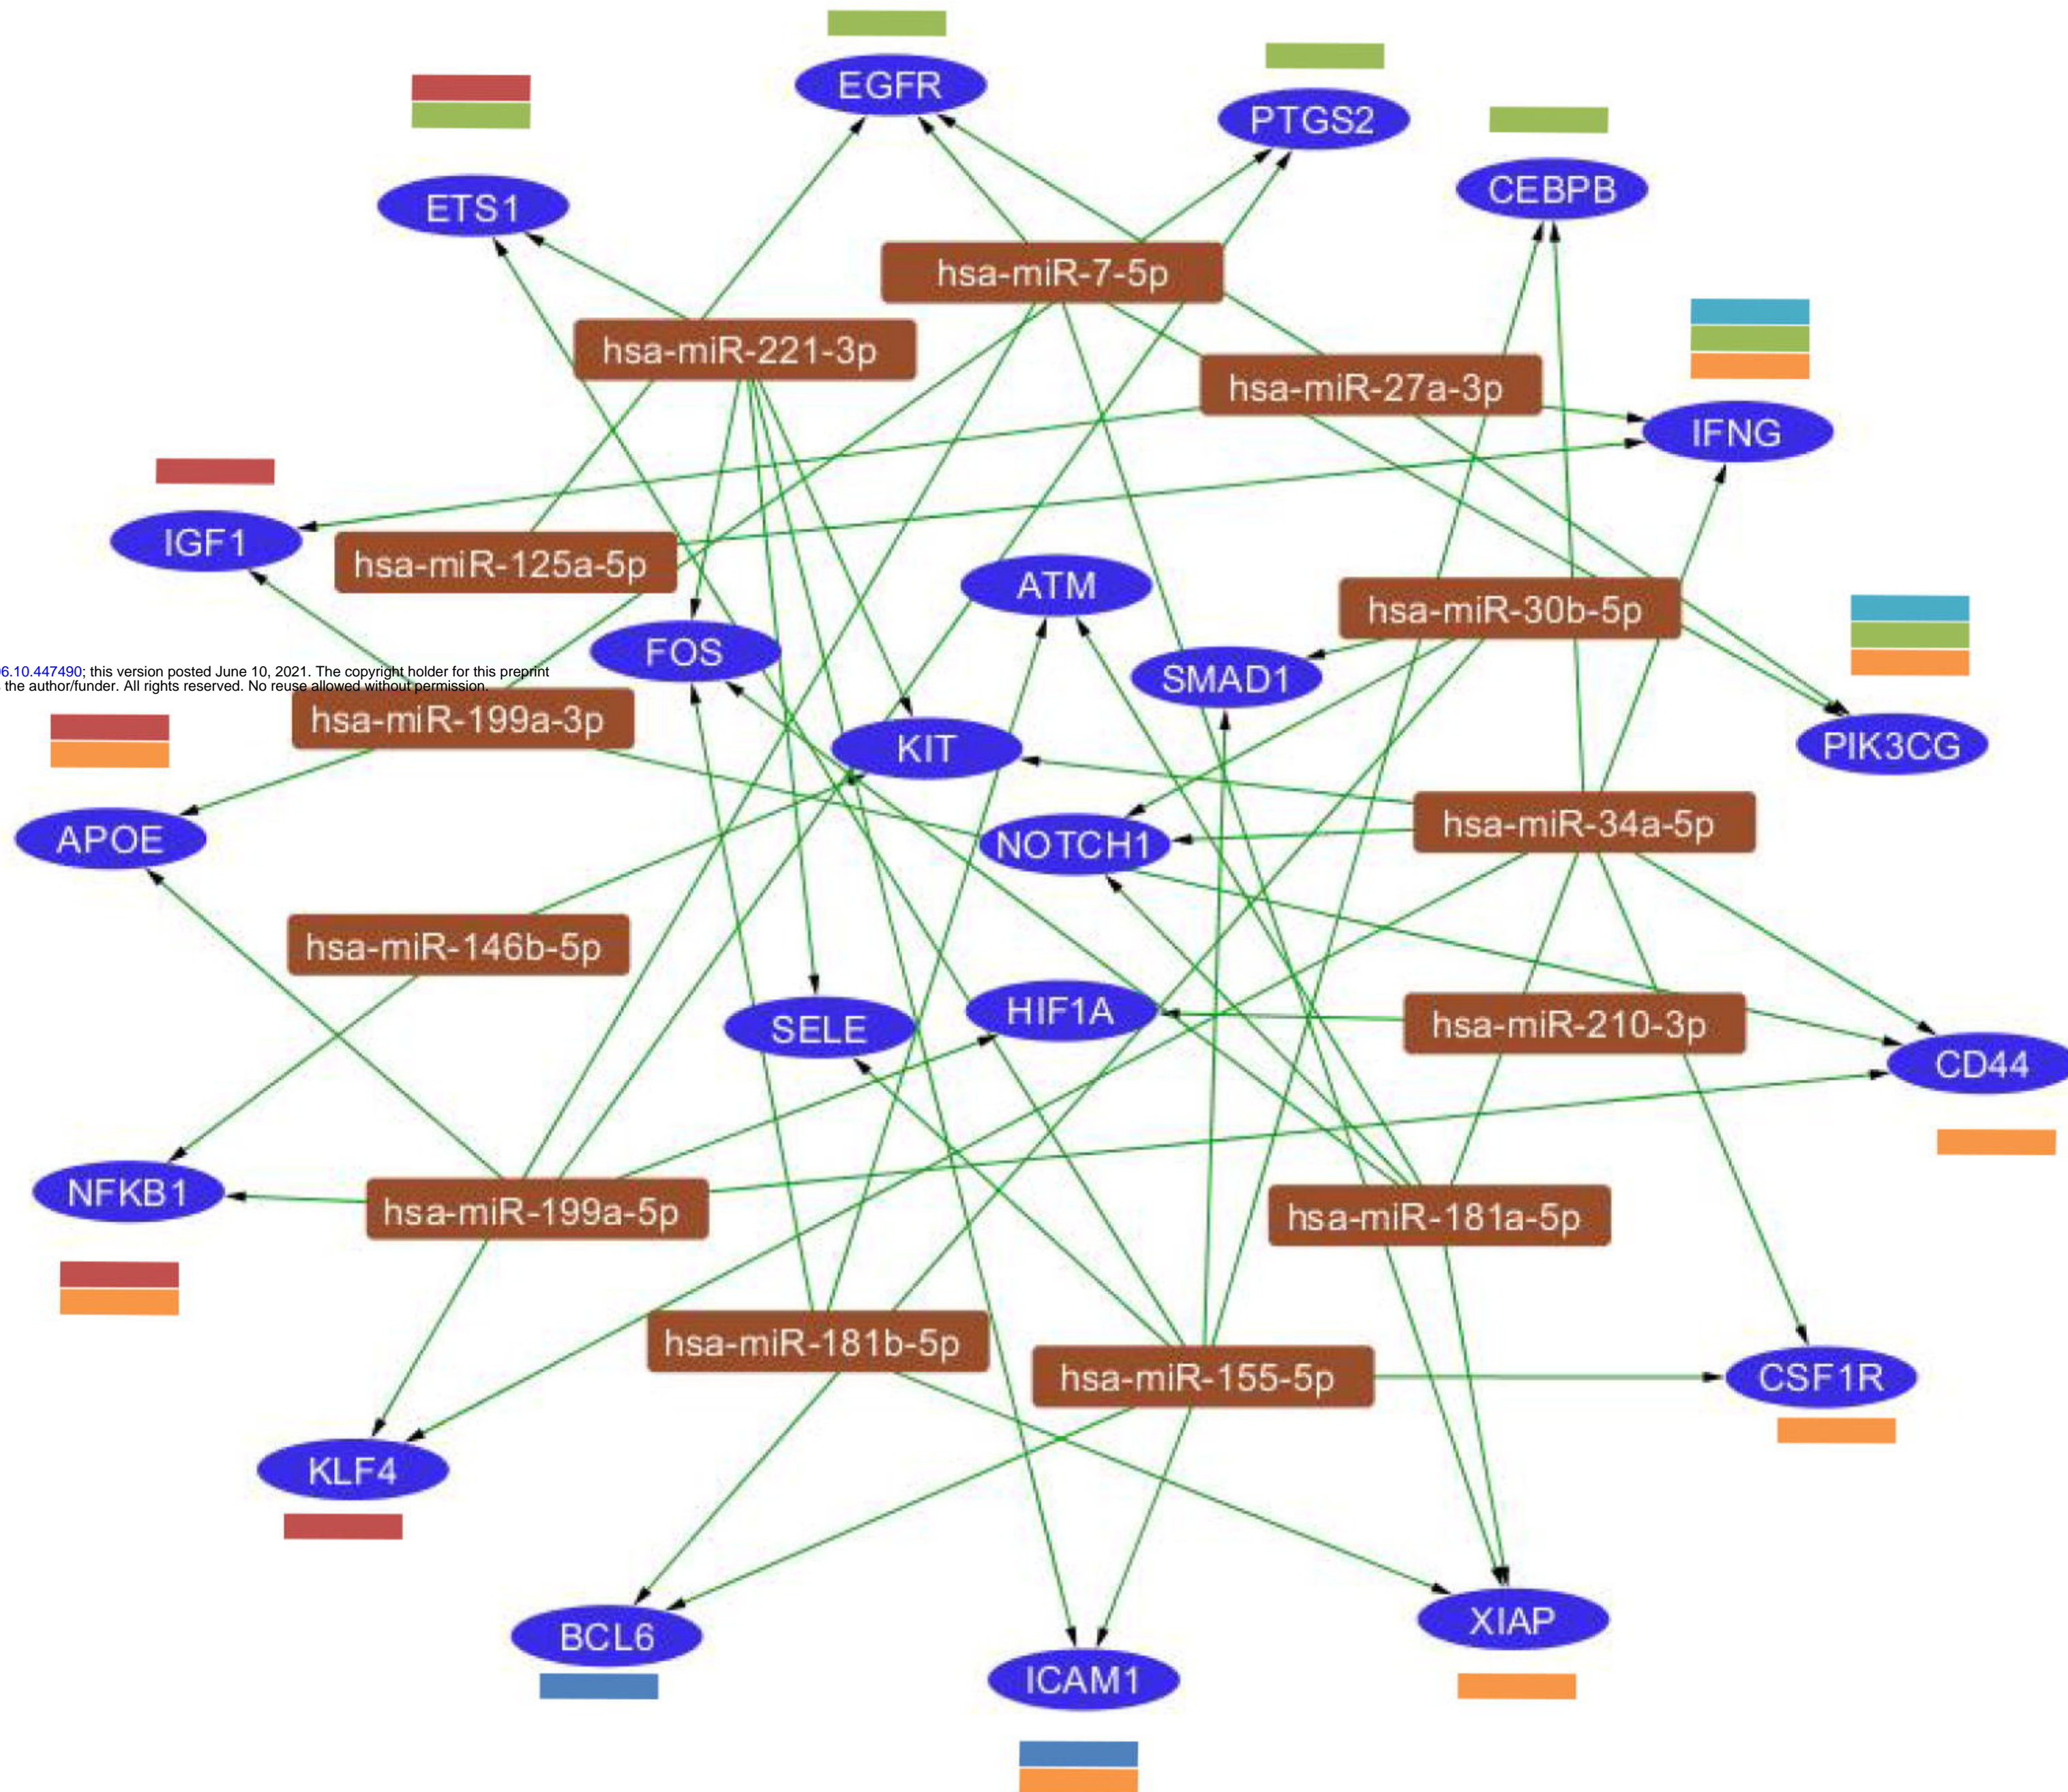



**(A)**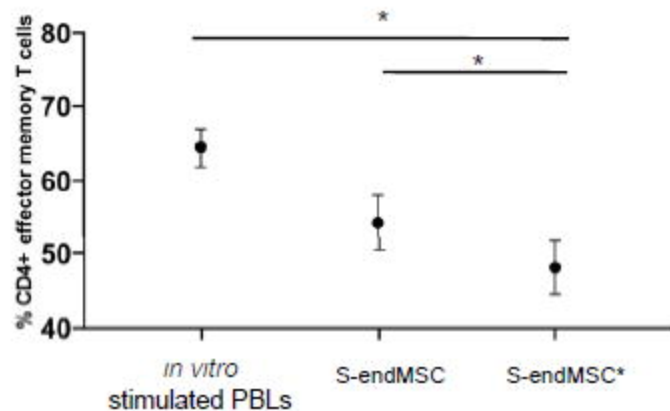**(B)**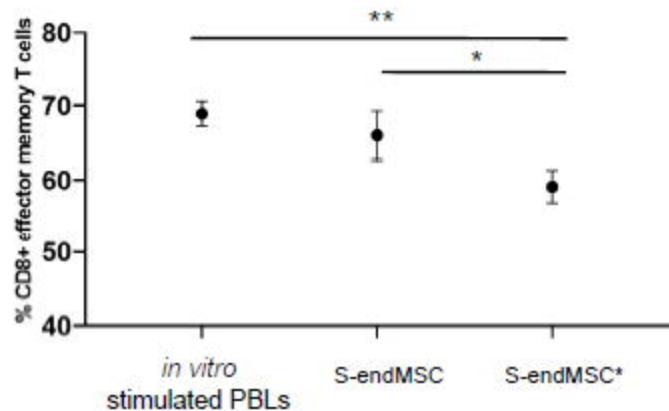**(C)**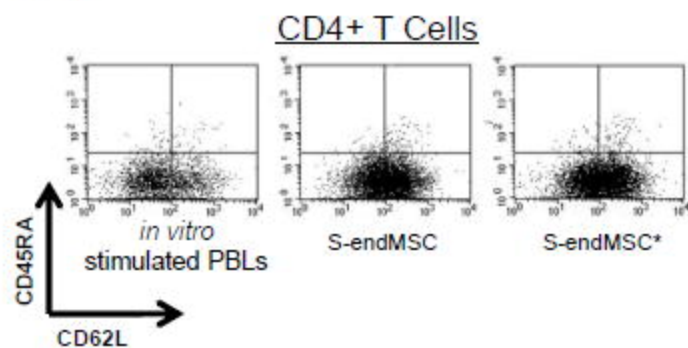**(D)**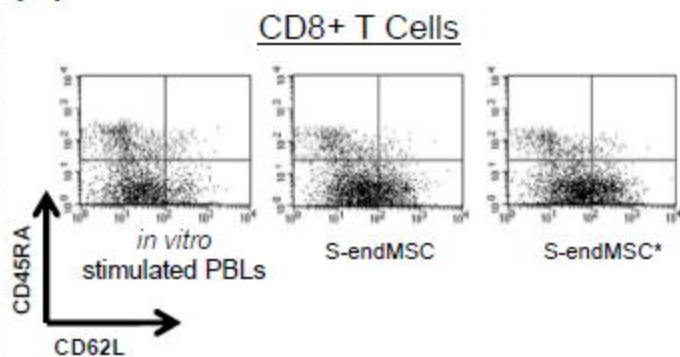

Source: http://biorxiv.org/content/10.1101/2021.06.10.447490v1.full.pdf
